# Supplementary material for: 3D printable organic room-temperature phosphorescent materials and printed real-time sensing and display devices
Source: Royal Society of Chemistry journal article supplement (doi:10.1039/d5sc00316d), 2025-01-01
Supplement: d5sc00316d5.pdf [file d5sc00316d5.pdf]

1 Supplemental Information

2

3 **3D Printable Organic Room-Temperature Phosphorescent Materials and Printed Real-**  
4 **Time Sensing and Display Devices**

5

6 **Haodong Sun, Yuxin Xiao, Yunfei He, Xiaoyu Wei, Jindou Zou, Yuanda Luo, Yazhang Wu,**

7 **Jiixin Zhao, Vonika Ka-Man Au and Tao Yu**

8

## **Additional experimental details**

### **Reagents and materials**

3,6-dibromo-9-phenyl-9H-carbazole, 3,6-dibromo-9H-carbazole, bromoethane, 9-phenyl-9H-carbazole, benzoyl chloride, 1,3-Diphenylisobenzofuran(DPBF), aluminium chloride ( $\text{AlCl}_3$ ), potassium hydroxide (KOH) and potassium carbonate ( $\text{K}_2\text{CO}_3$ ) were purchased from Shanghai Energy-Chemical Co. Ltd. and used without any further purification. Phenyl(4-(4,4,5,5-tetramethyl-1,3,2-dioxaborolan-2-yl)phenyl)methanone was synthesized according to our previous work.<sup>1</sup> Tetrakis(triphenylphosphine)palladium ( $\text{Pd}(\text{PPh}_3)_4$ ) was synthesized by our group. Poly(methyl methacrylate) (PMMA, average molecular weight  $\sim 200,000$ ) were also purchased from Shanghai Energy-Chemical Co. Ltd. The 3D printed resin used in digital light process (DLP) 3D printing was purchased from Time 80s.

### **Synthesis and Characterization of Final Compounds**

#### **Measurements**

$^1\text{H}$  NMR spectra were performed with on a Bruker AVANCE NEO 500 Nuclear Magnetic Resonance Spectrometer ((500 MHz)) in  $\text{CDCl}_3$  using tetramethylsilane (TMS) as the internal standard. High Resolution ESI mass spectra were collected from a MAT95XP-HRM spectrometer. High-performance liquid chromatography (HPLC) was performed on an UltiMate 3000 (Thermo Fisher Scientific). UV-vis absorption spectra of solutions were performed on a Hitachi U-3900 spectrophotometer. The steady emission and delayed emission spectra were tested on Edinburgh steady-transient fluorescence spectrometer (FLS-1000) equipped with a white light source and laser light sources (280 and 365 nm). The afterglow emissions of EtCzBP@PMMA at Fig. S32-S33 were measured by a Shimadzu RF-5301 PC spectrometer or an Ocean Optics Maya Pro2000 with 310 nm and 365nm Rhinospectrum RhinoLED as the excitation source. Absolute PL quantum yields were

measured using a Hamamatsu absolute PL quantum yield spectrometer (C11347-11 Quantaaurus-QY). Optical microscopy and laser scanning confocal microscopy (LSCM) were tested on Laser confocal microscopy system (C2+&N-SIM E, Nikon Instruments Inc.). The layer thickness upon each exposure polymer films was tested on YongXin NIB 610 (Guona Chenyu Technology Co., Ltd). Single-crystal analyses of EtCzBP and PhCzBP were determined using Bruker D8 Quest X-ray Single Crystal Diffractometer with a (Cu) X-ray source. The transmission of the films was also measured on Hitachi U-3900 and used an empty glass substrate and colorimetric dish as reference. Optical photographs and videos of the films and applications were shot by a Sony LICE-6400M camera. The infrared images of temperature distribution for the 3D printing materials and devices were obtained from the infrared imager (FOTRIC 323 Infrared Cameras). The intensity of UV light (365 nm) was obtained from the ultraviolet radiation meter (TENMARS TM-213).

### **Test environment**

Unless other noted, all photophysical properties of the films were collected at 298 K with relative humidity (RH) of ~30% in air.

## General procedures for synthesis of phosphorescence emitters

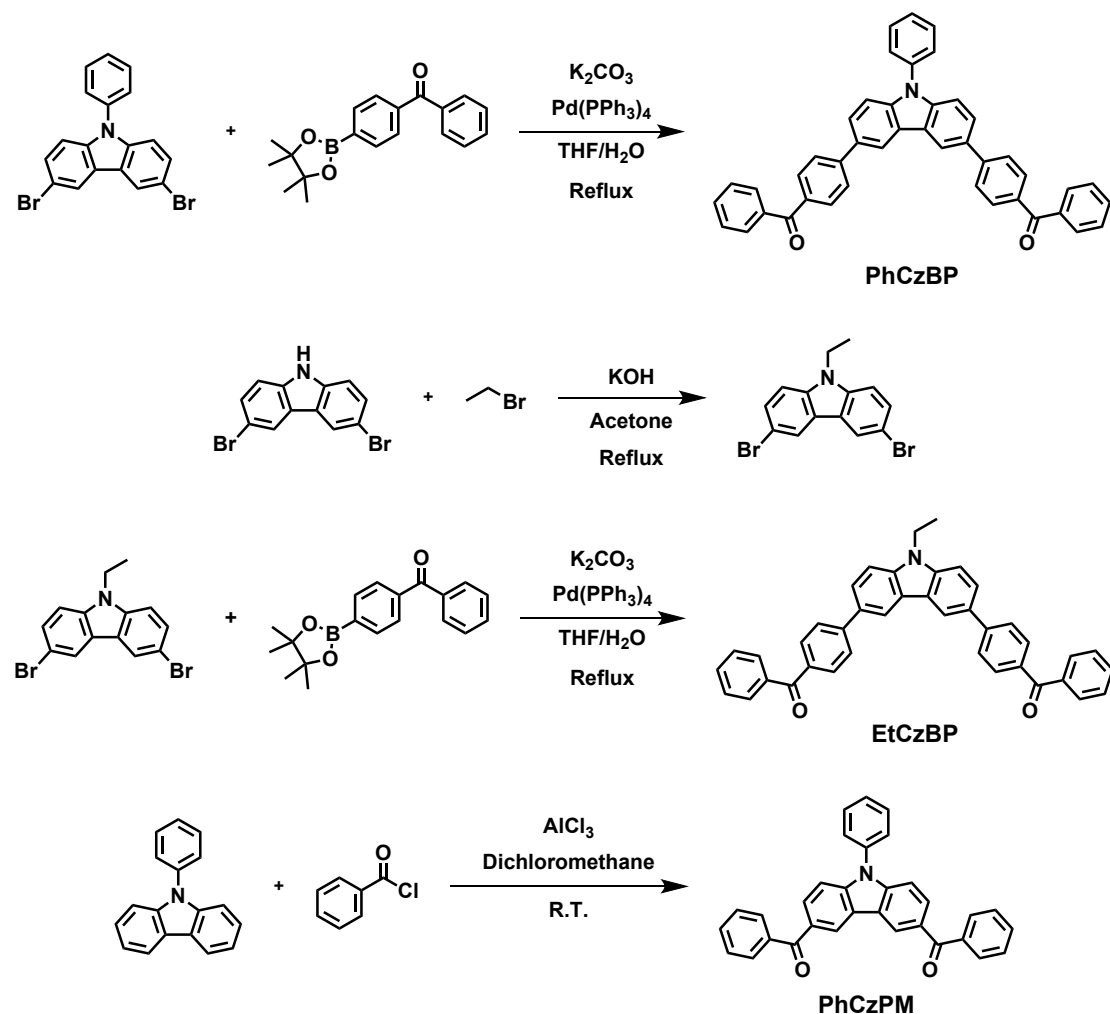

**Fig. S1.** The details for the synthetic routes of phosphors EtCzBr, PhCzBr, EtCzBP, PhCzBP and PhCzPM were listed.

### ((9-phenyl-9H-carbazole-3,6-diyl)bis(4,1-phenylene))bis(phenylmethanone)

**(PhCzBP).** 3,6-dibromo-9-phenyl-9H-carbazole (1.50 g, 3.74 mmol), phenyl(4-(4,4,5,5-tetramethyl-1,3,2-dioxaborolan-2-yl)phenyl)methanone (2.77 g, 8.98 mmol),  $K_2CO_3$  (3.10 g, 22.44 mmol) and  $Pd(PPh_3)_4$  (0.21 g, 0.187 mmol) were added to a dried flask (250 mL) filled with mixed solution of tetrahydrofuran (21 mL) and deionized water (7 mL) under argon atmosphere. The mixture was heated up to reflux temperature and stirred for 18 h. After cooling to room temperature, the mixed solution was distilled out to obtain dry solid. The dry solid was dissolved in

dichloromethane and washed with brine. After removal of the solvents of the organic layer, the crude products were purified by silica-gel chromatography with dichloromethane/n-hexane (1/1, v/v) to give PhCzBP (0.90 g, 39.86 %).  $^1\text{H}$  NMR (500 MHz, Chloroform-*d*), (TMS, ppm):  $\delta$  = 8.50 (s, 2H), 7.95 (d,  $J$  = 8.1 Hz, 4H), 7.87 (td,  $J$  = 5.3, 2.6 Hz, 8H), 7.76 (d,  $J$  = 8.6 Hz, 2H), 7.67 (t,  $J$  = 7.7 Hz, 2H), 7.65 – 7.59 (m, 4H), 7.53 (q,  $J$  = 7.6 Hz, 7H).  $^{13}\text{C}$  NMR (126 MHz, Chloroform-*d*)  $\delta$  196.37, 145.88, 141.40, 137.96, 135.60, 132.41, 132.34, 130.94, 130.13, 130.04, 128.34, 126.98, 125.90, 124.08, 119.26, 110.58. High-Resolution ESI-MS (Fig. S2)  $m/z$  calcd for  $[\text{C}_{44}\text{H}_{29}\text{NO}_2, \text{M}+\text{H}]^+$ , 604.2271; found: 604.2273.

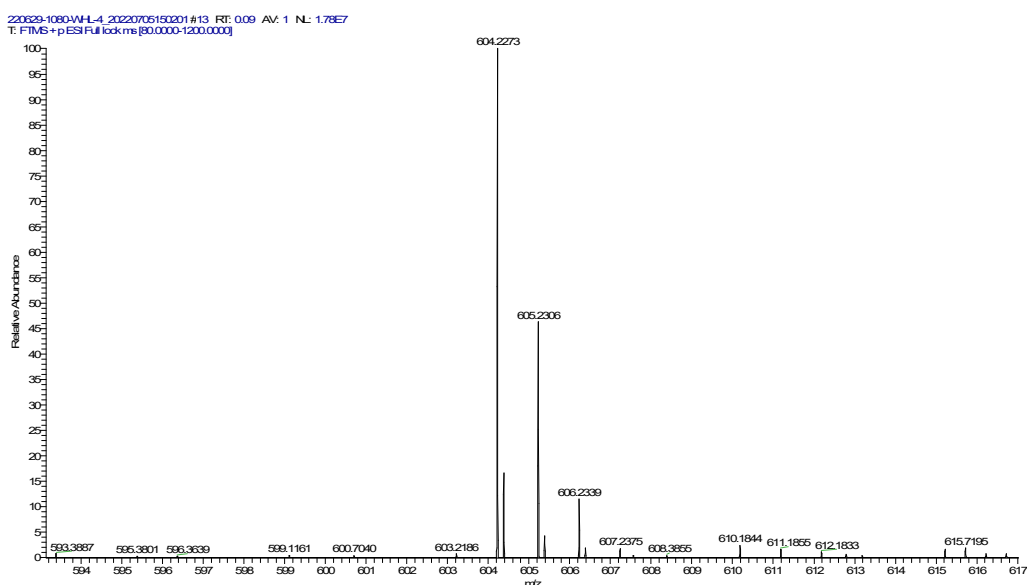

**Fig. S2.** High-Resolution ESI mass spectrum of PhCzBP.

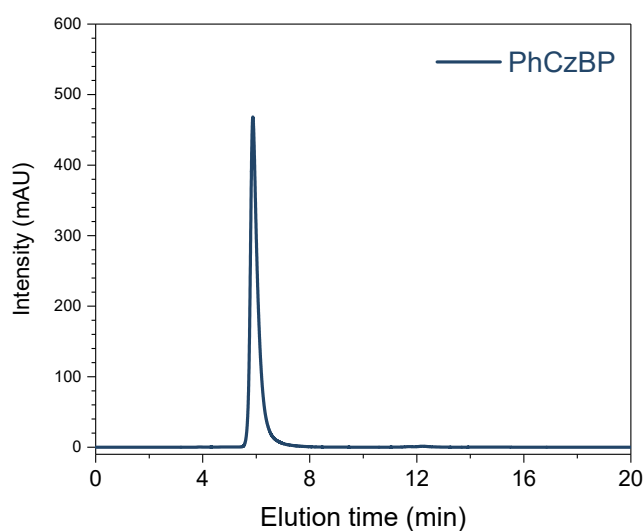

**Fig. S3.** HPLC spectrum of PhCzBP recorded at 254 nm with methanol as eluent.

**((9-ethyl-9H-carbazole-3,6-diyl)bis(4,1-phenylene))bis(phenylmethanone)**

**(EtCzBP).** 3,6-dibromo-9H-carbazole (3.00 g, 9.23 mmol), bromoethane (1.06 g, 9.69 mmol), and KOH (3.00 g, 13.85 mmol) were added to a dried flask (250 mL) filled with acetone (30 mL) under ambient conditions. The mixture was heated up to reflux temperature and stirred for 18 h. After cooling to room temperature, the mixed solution was distilled out to obtain dry solid.<sup>2</sup> The dry solid was dissolved in dichloromethane and washed with brine. After removal of the solvents of the organic layer, the crude products were purified by silica-gel chromatography with dichloromethane/n-hexane (1/10, v /v) to give 3,6-dibromo-9-ethyl-9H-carbazole (2.23 g, 68.43 %). The synthetic procedure of EtCzBP was identical to that of PhCzBP, (0.31 g, 66.85 %). <sup>1</sup>H NMR (500 MHz, Chloroform-*d*), (TMS, ppm):  $\delta$  = 8.49 (s, 2H), 7.97 (d, 4H), 7.89 (t, 8H), 7.85 (d,  $J$  = 8.5, 2H), 7.63 (t, 2H), 7.59 – 7.52 (m, 6H), 4.49 (q,  $J$  = 7.2 Hz, 2H), 1.55 (t, 3H). <sup>13</sup>C NMR (126 MHz, Chloroform-*d*)  $\delta$  195.28, 136.89, 134.32, 131.21, 130.14, 129.83, 128.94, 128.92, 127.23, 125.79, 124.50, 118.26, 108.16, 36.82, 12.85. High-Resolution ESI-MS (Fig. S3)  $m/z$  calcd for [C<sub>40</sub>H<sub>29</sub>NO<sub>2</sub>, M+H]<sup>+</sup>, 556.2271; found: 556.2273.

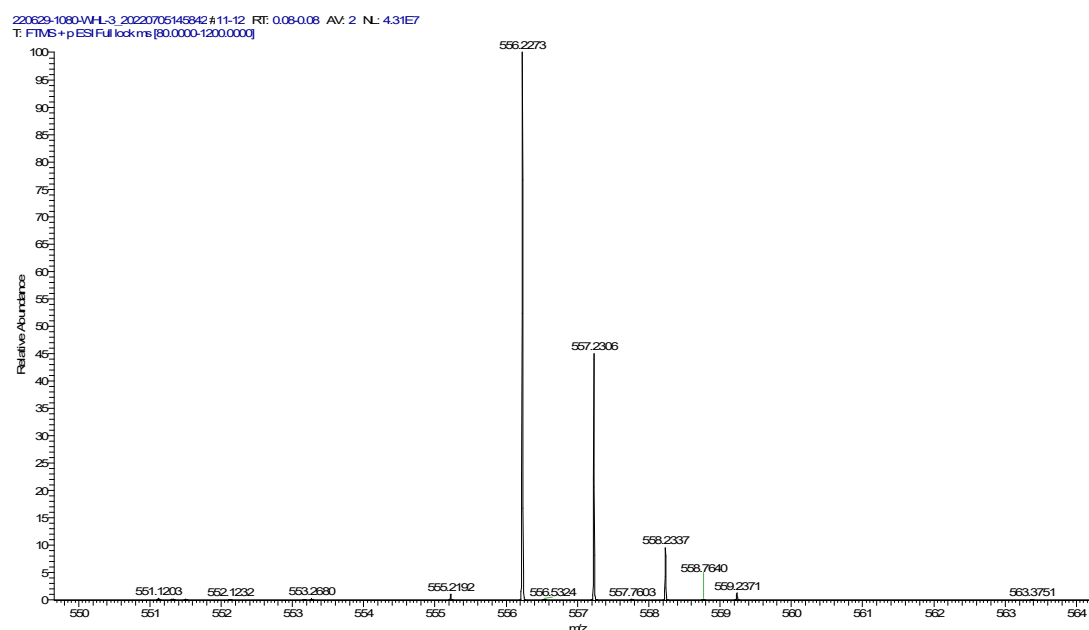

**Fig. S4.** High-Resolution ESI mass spectrum of EtCzBP.

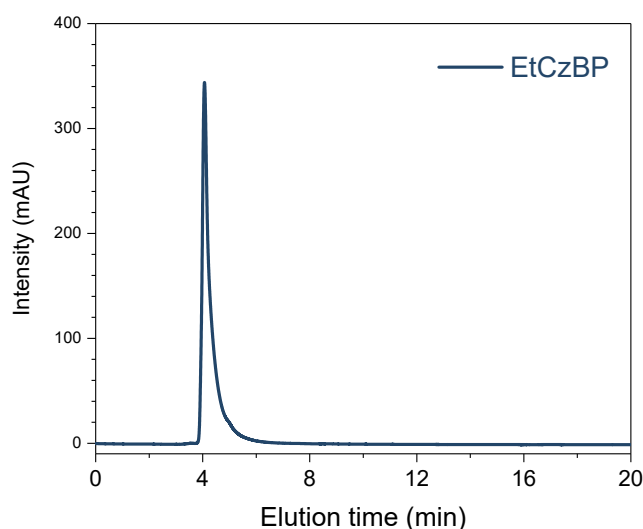

**Fig. S5.** HPLC spectrum of EtCzBP recorded at 254 nm with methanol as eluent.

**Synthetic details of (9-phenyl-9H-carbazole-3,6-diyl)bis(phenylmethanone) (PhCzPM).** The synthetic route of PhCzPM was shown in Scheme S3. A stirred mixture of 9-phenyl-9H-carbazole (1.00 g, 4.11 mmol) and benzoyl chloride (1.16 g, 8.22 mmol) in dichloromethane (30 mL) was treated by slow addition of  $\text{AlCl}_3$  (3.29 g, 24.66 mmol) under argon atmosphere. The mixture was stirred at room temperature for 6 h. After the reaction was completed, cold water was added to the reaction until no bubbles were formed. The mixture was then extracted with dichloromethane ( $3 \times 50$  mL). After removal of the solvents of the organic layer, the crude products were purified by silica-gel chromatography with dichloromethane/n-hexane (1/1, v/v) to give PhCzPM (0.84 g, 45.16%).  $^1\text{H}$  NMR (500 MHz, Chloroform-*d*), (TMS, ppm):  $\delta$  = 8.67 (d, 2H), 8.03 (d,  $J$  = 8.6 Hz, 2H), 7.87 (d, 4H), 7.71 (t,  $J$  = 7.8 Hz, 2H), 7.66 – 7.58 (m, 5H), 7.55 (t,  $J$  = 7.6 Hz, 4H), 7.48 (d,  $J$  = 8.6 Hz, 2H).  $^{13}\text{C}$  NMR (126 MHz, Chloroform-*d*) 195.36, 143.18, 137.48, 135.29, 131.02, 129.49, 129.27, 129.12, 128.93, 128.24, 127.69, 127.30, 126.12, 122.99, 122.02, 108.96, 76.25, 75.99, 75.74. High-Resolution ESI-MS (Fig. S4)  $m/z$  calcd for  $[\text{C}_{32}\text{H}_{21}\text{NO}_2, \text{M}+\text{H}]^+$ , 452.1645; found: 452.1647.

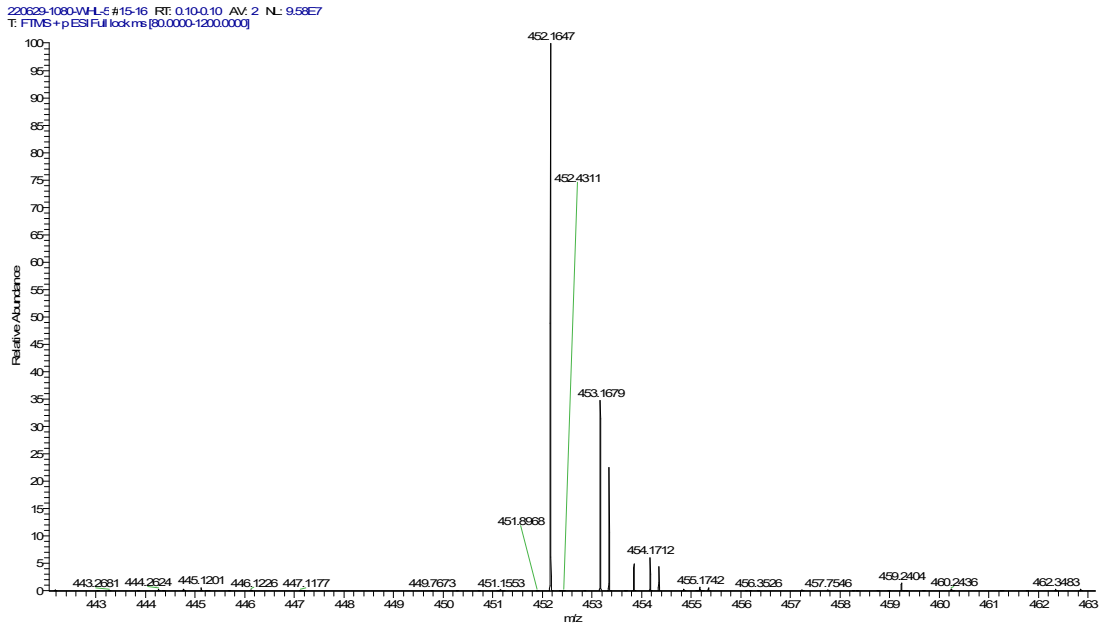

**Fig. S6.** High-Resolution ESI mass spectrum of PhCzPM.

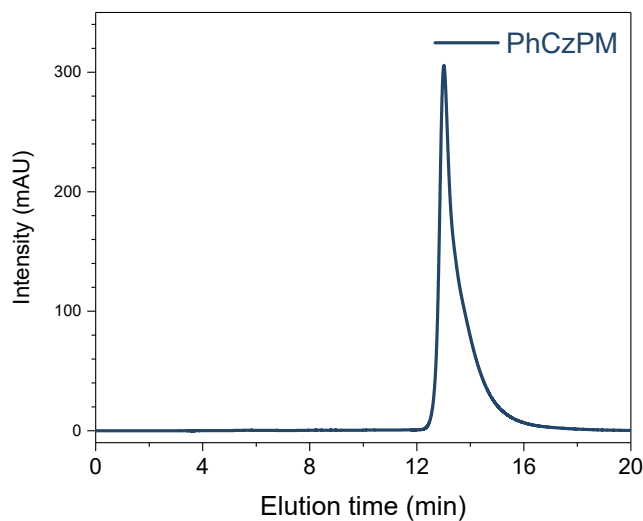

**Fig. S7.** HPLC spectrum of PhCzPM recorded at 254 nm with methanol: water as eluent in ratios of 90:10 (v/v).

### Film preparation

PMMA solution (100mg/mL): PMMA (2 g) and tetrahydrofuran (THF, 20 mL) solvent were mixed in a flask and stirred for 24 hours at room temperature until the PMMA particles completely dissolved. The clear PMMA/THF solution was used for the subsequent film fabrication.



Mixed EtCzBP (5 mg), PhCzBP (5 mg), or PhCzPM (5 mg) in PMMA/THF solution (5 mL) at a vessel. The mixture was ultrasonicated for 1 h and then the mixture (1 mL) was dropped onto a glass substrate (3 cm× 3 cm). After evaporation of the solvent, the films were placed in a drying oven at 70 °C for 6 h. Then the EtCzBP@PMMA, PhCzBP@PMMA and PhCzPM@PMMA films with a mass ratio of 5 wt% were obtained.

### **Singlet oxygen detection**

1,3-Diphenylisobenzofuran (DPBF) was used as a detector to monitor the production of singlet oxygen. A solution of DPBF and a mixed solution of EtCzBP&DPBF at a concentration of  $1.0 \times 10^{-5}$  M in N,N-Dimethylformamide (DMF) were prepared. The decomposition of DPBF was examined by recording the absorbance at 415 nm at various irradiation times, an UV light (365 nm) was employed as the irradiation source.<sup>3-5</sup>

### **3D printing structure preparation**

The 3D printed resin consists of methyl methacrylate (MMA, 40 wt%), tert-Butyl acrylate (t-BA, 40 wt%), aliphatic urethane diacrylate (AUD 20 wt%), and the photoinitiator, 2,4,6-trimethylbenzoyldiphenyl phosphine oxide (TPO, 1.5 wt%).

3D structures were fabricated using a commercial Digital Light Processing (DLP) 3D printer (nanoArch P150, BMF Material, China) equipped with a 405 nm light source. The model underwent processing using 3Dmax software, followed by slicing of the STL file using BMF slice software to generate 2D images (1920 × 1080) with a thickness of 50 μm. Throughout the printing process, an exposure intensity of 9.2 mW/cm<sup>2</sup> and an exposure time per layer of 3 seconds were maintained. After printing, the printed structures underwent post-processing involving ultrasonic cleaning with ethanol to remove residual resin, followed by curing in a photocuring oven (405 nm, BMF G2, China) at room temperature for 1 hour.

### **Thermotic calculation details**

The molecular geometry optimization and excitation energy calculation of EtCzBP, PhCzBP, and PhCzPM were realized by density function theory (DFT) and time-dependent DFT, respectively. The calculation process was performed in Gaussian 09 program at the B3LYP/6-311G\* level.<sup>6, 7</sup> Spin-orbital couplings (SOC) constants between the singlet and triplet excited states were calculated via ORCA 4.2.1 at B3LYP/6-311G\* level.<sup>8</sup> The electron and hole analysis of the specific energy level was performed with Multiwfn 3.8 code.<sup>9, 10</sup> The isosurface maps of electron and hole distribution were rendered by Visual Molecular Dynamics (VMD) software (version 1.9.3).<sup>11</sup>

### Supplementary Fig.s

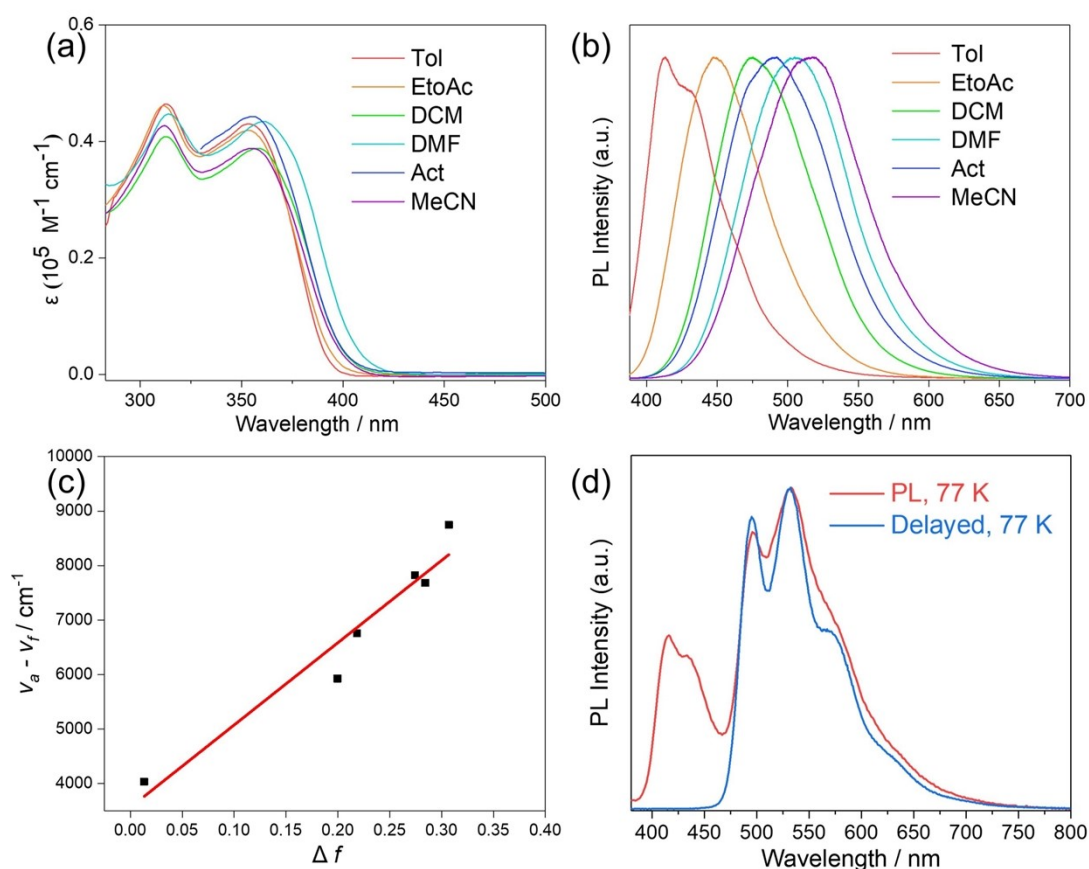

**Fig. S8.** The photophysical properties of EtCzBP in dilute solutions. (a) The UV-Vis absorption spectra in different solvents with concentration of  $1.0 \times 10^{-5}$  mol/L. (Tol:

toluene, EtoAc: ethyl acetate, DCM:dichloromethane, DMF: dimethylformamide, Act:a cetone) (b) The steady-state PL spectra of EtCzBP in different solvents with concentration of  $1.0 \times 10^{-5}$  mol/L. (c) Lippert-Mataga of EtCzBP in solvents of increasing polarity. The slope for the fit is  $3565 \text{ cm}^{-1}$  ( $R^2 = 0.94$ ). (d) The steady-state PL spectrum and delayed spectrum (delayed time = 8 ms) of EtCzBP in 2-MeTHF solvents ( $1.0 \times 10^{-5}$  mol/L) at 77 K.

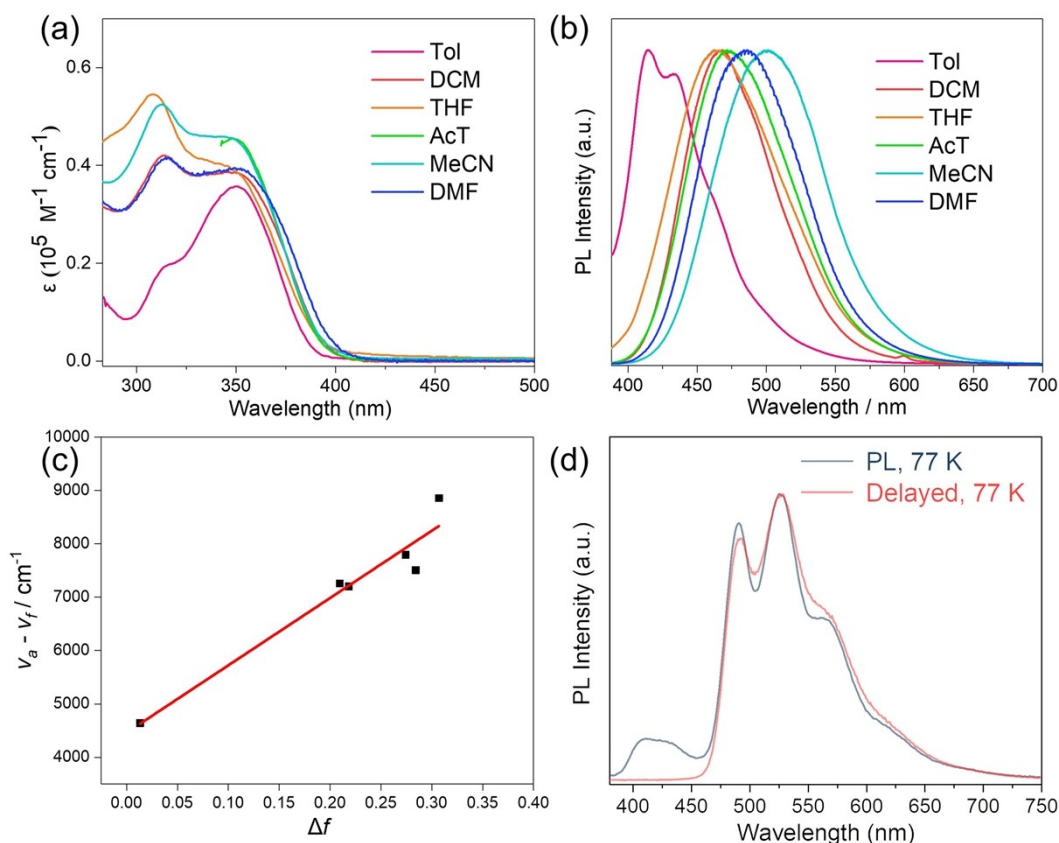

**Fig. S9.** The photophysical properties of PhCzBP in dilute solutions. (a) The UV-Vis absorption spectra in different solvents with concentration of  $1.0 \times 10^{-5}$  mol/L. (THF: Tetrahydrofuran)(b) The steady-state PL spectra of PhCzBP in different solvents with concentration of  $1.0 \times 10^{-5}$  mol/L. (c) Lippert-Mataga of PhCzBP in solvents of increasing polarity. The slope for the fit is  $4462 \text{ cm}^{-1}$  ( $R^2 = 0.94$ ).(d) The steady-state PL spectrum and delayed spectrum (delayed time = 8 ms) of PhCzBP in 2-MeTHF solvents ( $1.0 \times 10^{-5}$  mol/L) at 77 K.

### Lippert-Mataga equation

According to the Lippert-Mataga equation as shown in below, where  $\epsilon$  is the dielectric constant of the solvent, and  $n$  is the solvent's refractive index.

$$\Delta f = \frac{\epsilon-1}{2\epsilon+1} - \frac{n^2-1}{2n^2+1}$$

According to the Lippert-Mataga method, the change in the dipole moment,  $\Delta\mu$ , is a function of the solvent's polarizability, and the Stokes shift ( $\Delta\nu_{st}$ ) as follows: where  $\nu_A$  is the energy of the absorbance maximum in wavenumbers and  $\nu_E$  is the energy of the emission maximum in wavenumbers.

$$\Delta\nu_{st} = \nu_A - \nu_E = \frac{2\Delta\mu^2}{hc\rho^3}\Delta f + Constant$$

Table S1. Absorption maxima, emission maxima in various solvents for EtCzBP with the dielectric constant ( $\epsilon$ ) and the refractive index ( $n$ ) of the solvent.

| Solvent  | $\lambda_{abs.}$ | $\lambda_f$ | $\nu_a - \nu_{em} (cm^{-1})$ | $\Delta f$ | $\epsilon$ | $n$    |
|----------|------------------|-------------|------------------------------|------------|------------|--------|
| n-Hexane | 345              | 410         | 4595.2633                    | -0.0060    | 1.87       | 1.3840 |
| TOL      | 354              | 413         | 4035.5125                    | 0.0132     | 2.38       | 1.4969 |
| EtoAc    | 354              | 448         | 5927.1590                    | 0.1996     | 6.02       | 1.3724 |
| DCM      | 359              | 474         | 6758.1068                    | 0.2184     | 9.1        | 1.4244 |
| AcT      | 356              | 490         | 7681.7244                    | 0.2843     | 20.7       | 1.3588 |
| DMF      | 362              | 505         | 7822.3292                    | 0.2744     | 36.7       | 1.4305 |
| MeCN     | 356              | 517         | 8747.5279                    | 0.3070     | 38.8       | 1.3416 |

Table S2. Absorption maxima, emission maxima in various solvents for PhCzBP with the dielectric constant ( $\epsilon$ ) and the refractive index ( $n$ ) of the solvent.

| Solvent | $\lambda_{abs.}$ | $\lambda_f$ | $\nu_a - \nu_f (cm^{-1})$ | $\Delta f$ | $\epsilon$ | $n$    |
|---------|------------------|-------------|---------------------------|------------|------------|--------|
| TOL     | 348              | 415         | 4639.246642               | 0.0132     | 2.38       | 1.4969 |
| DCM     | 350              | 468         | 7203.907204               | 0.2184     | 9.1        | 1.4244 |

|      |       |     |             |        |      |        |
|------|-------|-----|-------------|--------|------|--------|
| THF  | 346   | 462 | 7256.712459 | 0.2096 | 7.58 | 1.4072 |
| AcT  | 348.5 | 472 | 7507.963913 | 0.2843 | 20.7 | 1.3588 |
| MeCN | 347   | 501 | 8858.363964 | 0.3070 | 38.8 | 1.3416 |
| DMF  | 352.5 | 486 | 7792.662639 | 0.2744 | 36.7 | 1.4305 |

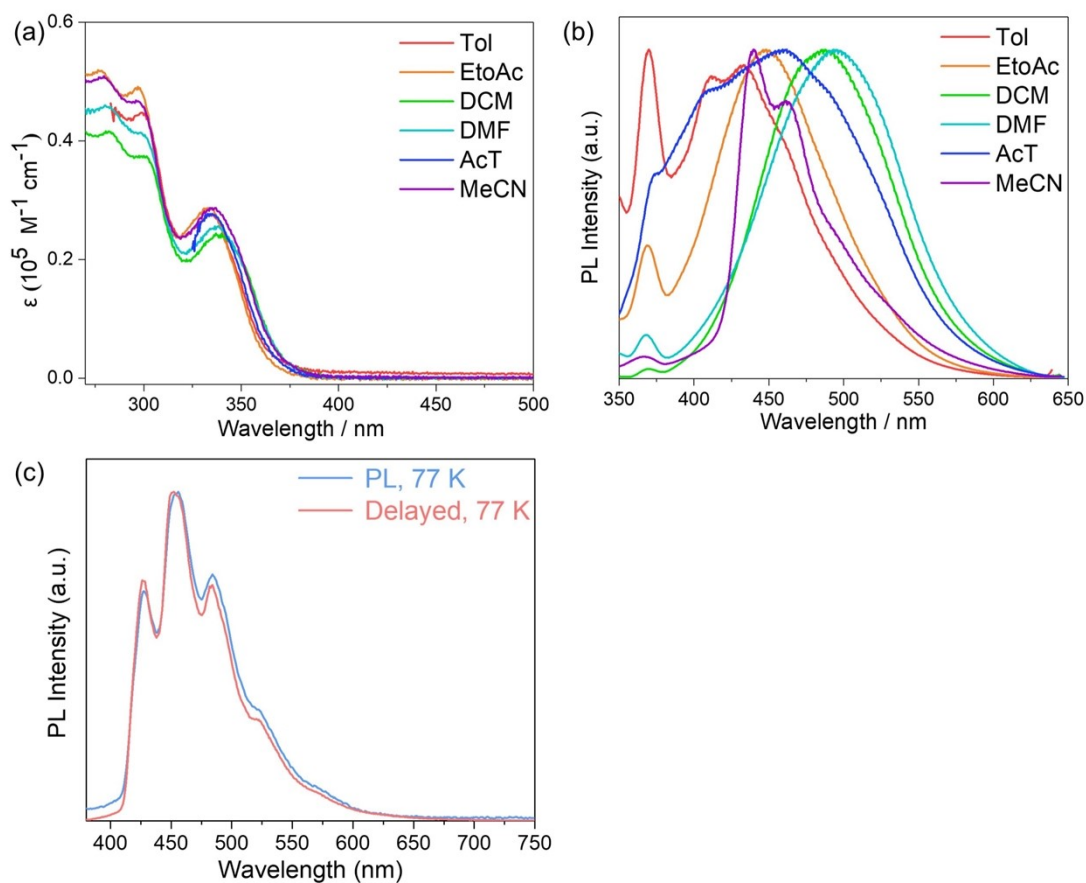

**Fig. S10.** The photophysical properties of PhCzPM in dilute solutions. (a) The UV-Vis absorption spectra in different solvents with concentration of  $1.0 \times 10^{-5}$  mol/L. (b) The steady-state PL spectra of PhCzPM in different solvents with concentration of  $1.0 \times 10^{-5}$  mol/L. (c) The steady-state PL spectrum and delayed spectrum (delayed time = 8 ms) of PhCzPM in 2-MeTHF solvents ( $1.0 \times 10^{-5}$  mol/L) at 77 K.

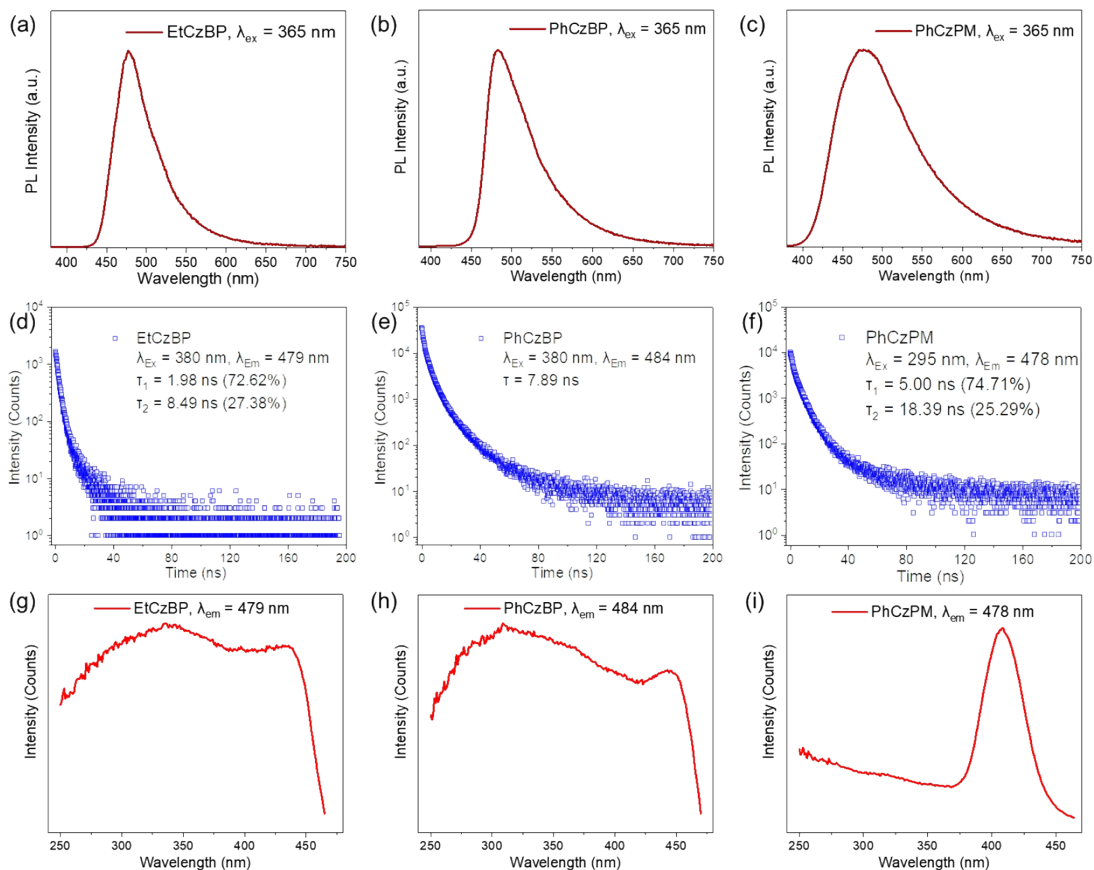

**Fig. S11.** The photophysical properties of crystalline EtCzBP, PhCzBP and PhCzPM. (a), (d) and (g) were the steady-state PL spectra, the time-resolved decay curves and excitation spectra for EtCzBP, respectively. (b), (e) and (h) were the steady-state PL spectra, the time-resolved decay curves and excitation spectra for PhCzBP, respectively. (c), (f) and (i) were the steady-state PL spectra, the time-resolved decay curves and excitation spectra for PhCzPM, respectively. (d, EtCzBP:  $\tau_{\text{int}}=3.76\pm 0.10$  ns,  $X^2=1.07$ ; PhCzBP:  $\tau_{\text{int}}=7.89\pm 0.25$  ns,  $X^2=1.18$ ; PhCzPM:  $\tau_{\text{int}}=8.39\pm 0.20$  ns,  $X^2=1.23$ )

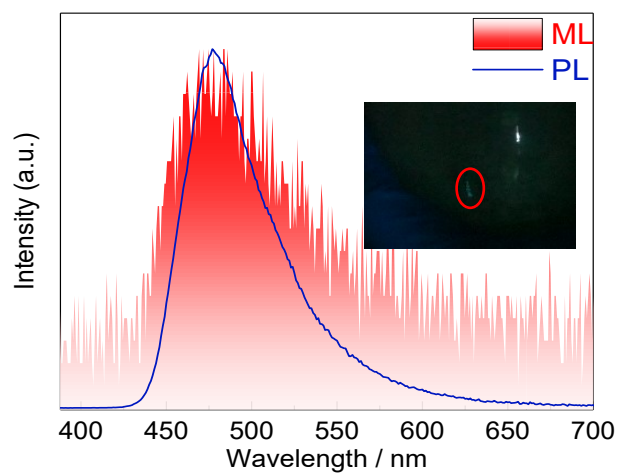

**Fig. S12.** Normalized PL and ML spectrum of crystalline EtCzBP at ambient conditions, inset: photograph of ML phenomenon generated by crushing EtCzBP in the dark with a scraper.

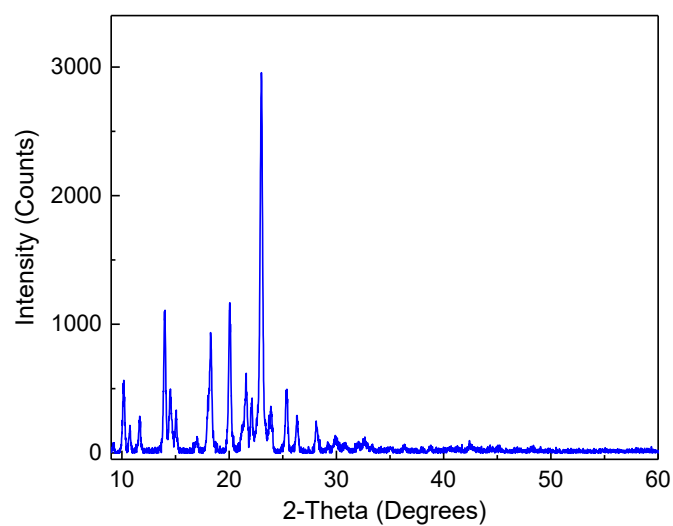

**Fig. S13.** XRD pattern of crystalline EtCzBP.

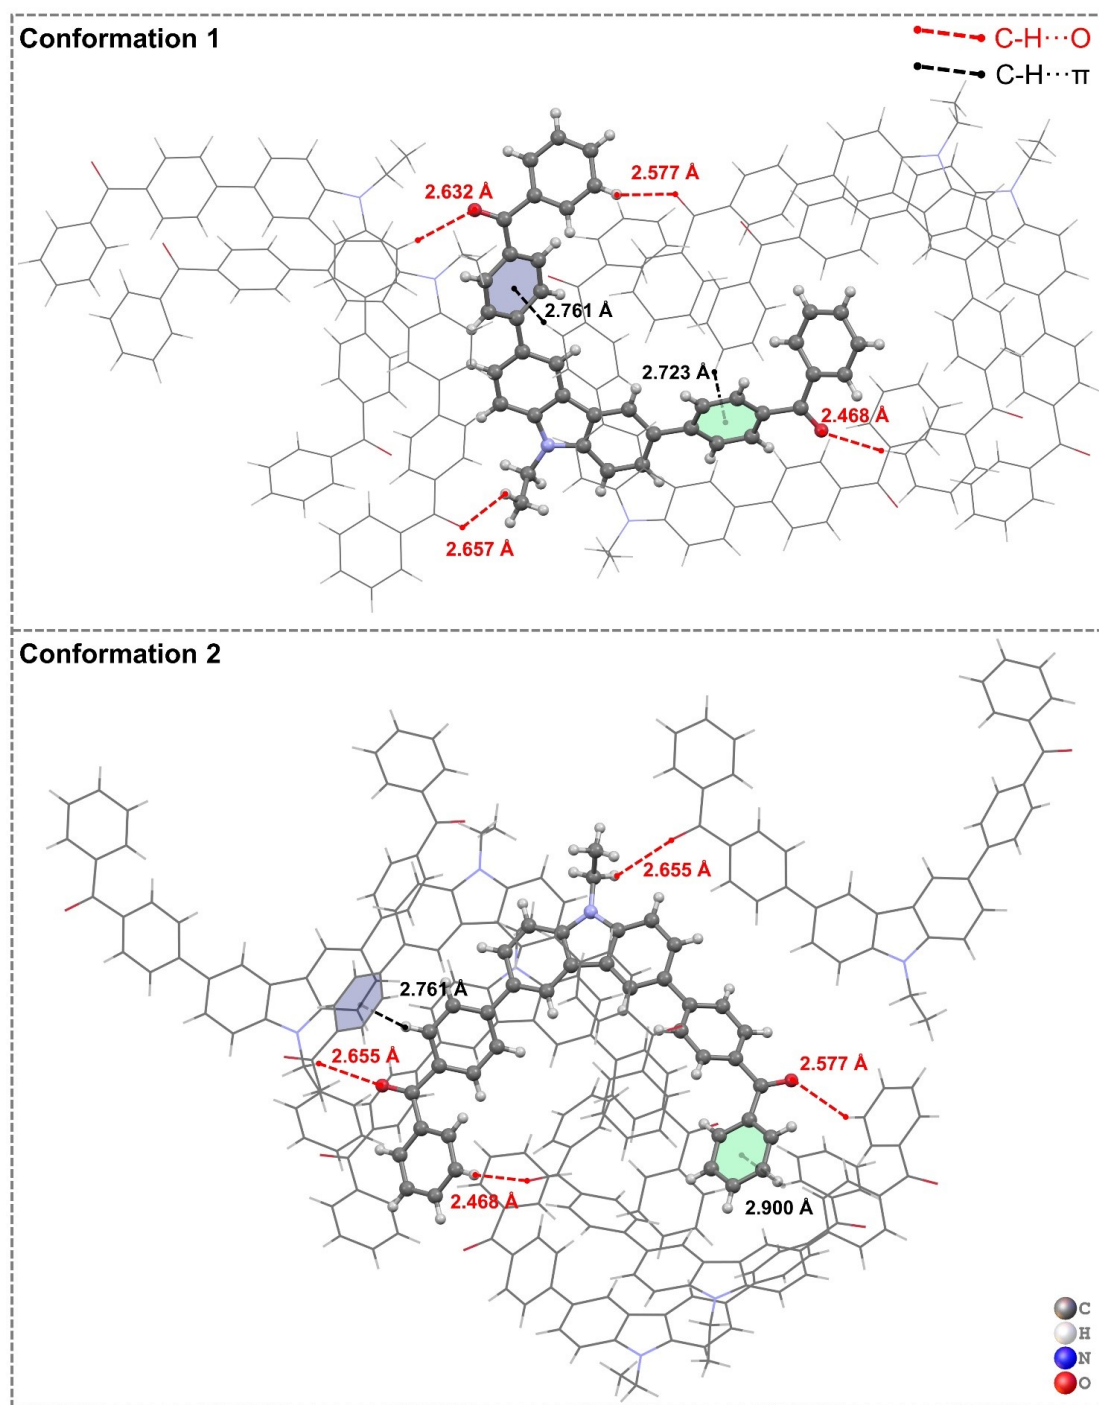

**Fig. S14.** Different intermolecular interactions in the single crystal of EtCzBP (CCDC 2189250).



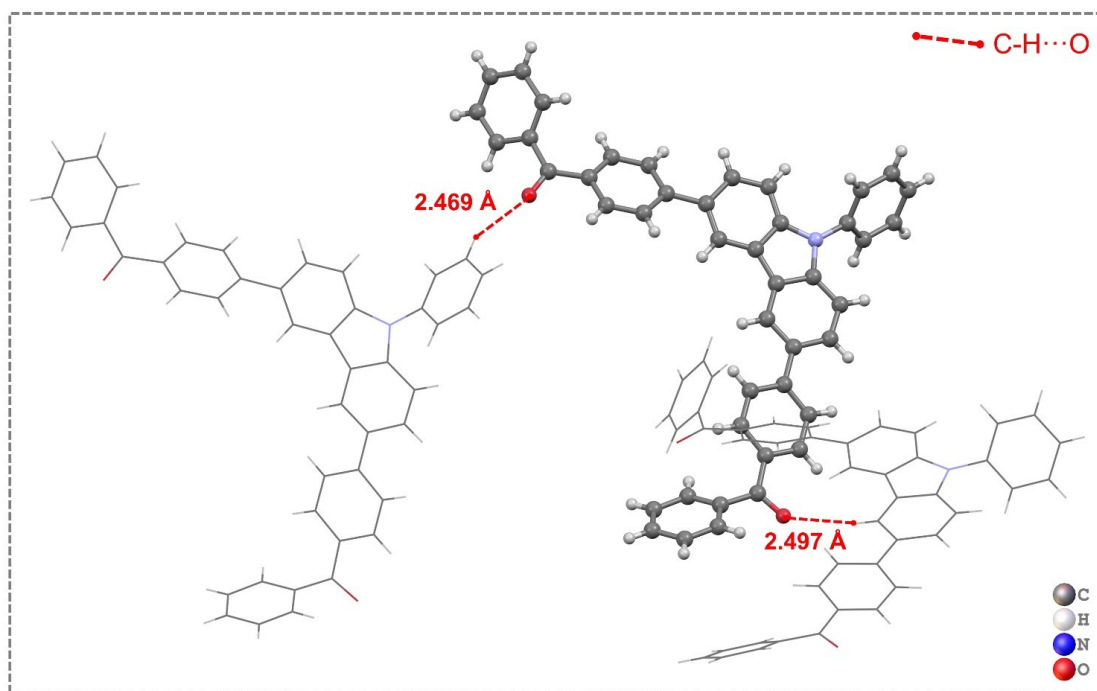

**Fig. S15.** Different intermolecular interactions in the single crystal of PhCzBP (CCDC 2299673).

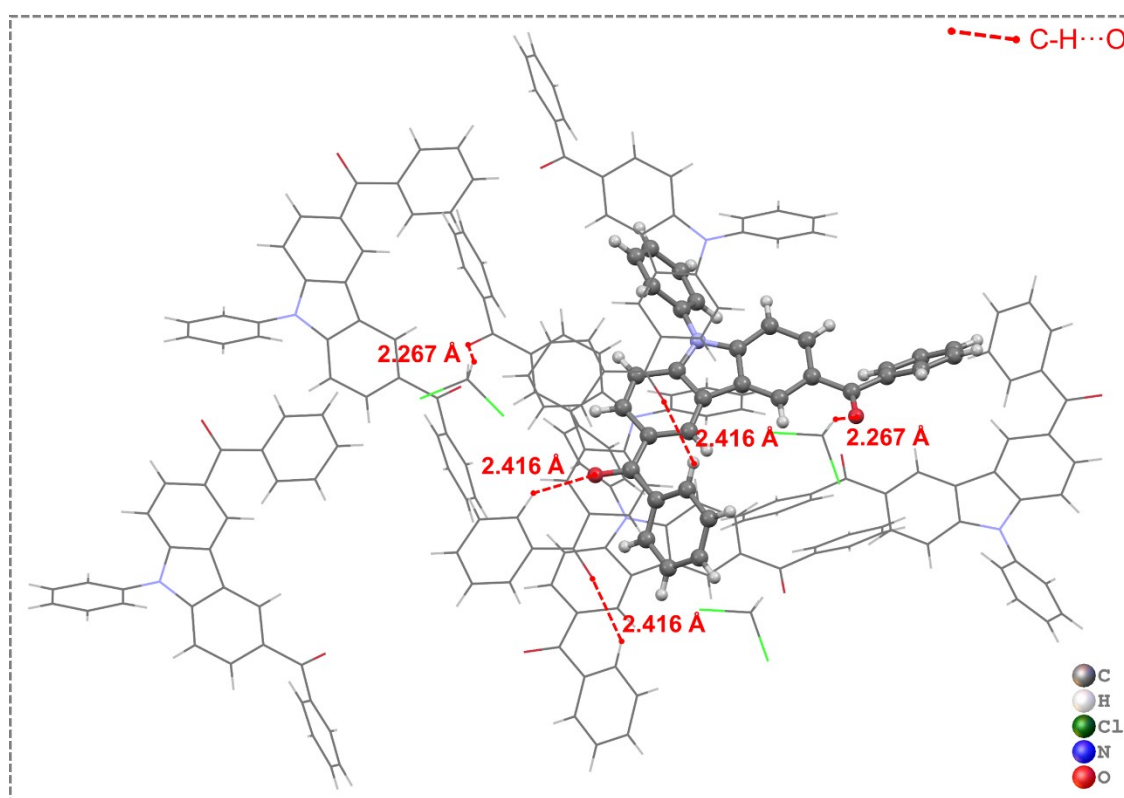

**Fig. S16.** Different intermolecular interactions in the single crystal of PhCzPM (CCDC 2341195).

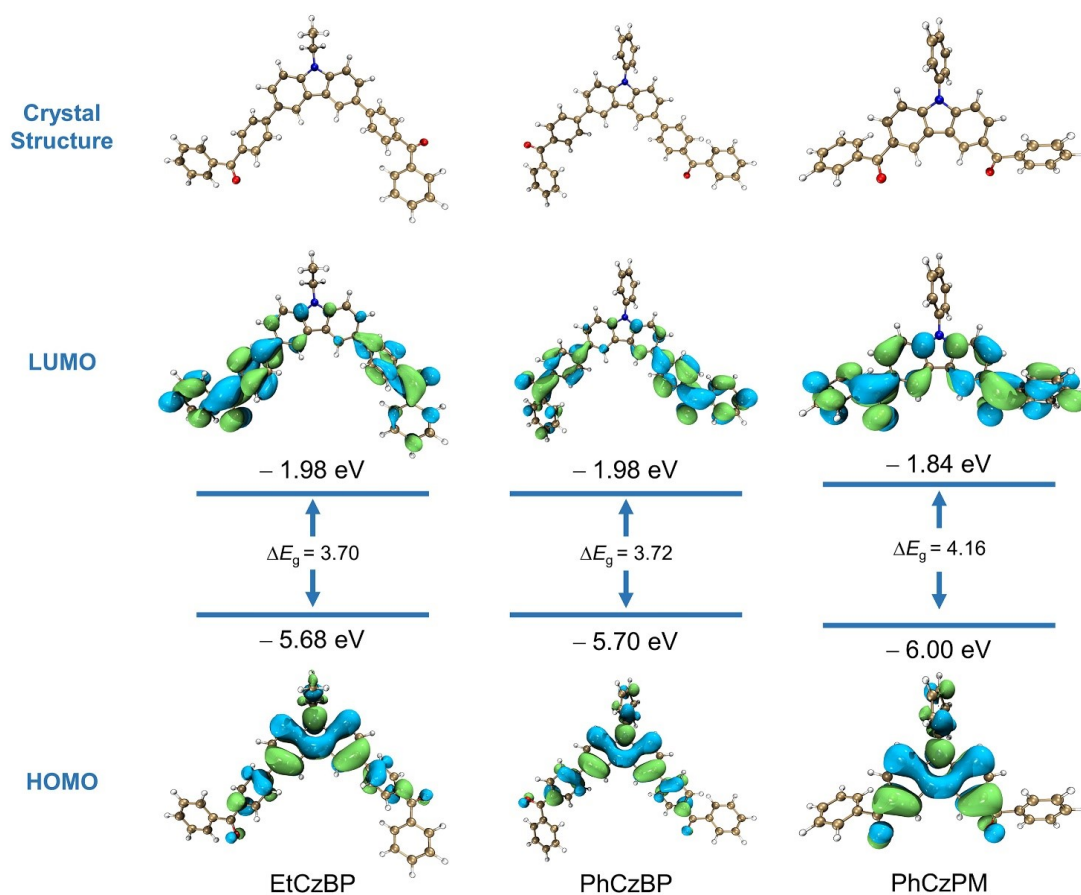

**Fig. S17.** The highest occupied molecular orbitals (HOMO) and the lowest unoccupied molecular orbitals (LUMO) density maps of EtCzBP, PhCzBP and PhCzPM. (Calculated at the B3LYP/6-311G\* level, isovalue = 0.02)

**Table S3** The energy levels and transition configurations of EtCzBP revealed by TD-DFT calculations.

| Excited States | n-th | Energy (eV) | Transition configurations (%)                                               |
|----------------|------|-------------|-----------------------------------------------------------------------------|
| S <sub>n</sub> | 1    | 3.3012      | H → L 94.5%                                                                 |
|                | 2    | 3.4417      | H → L+1 92.3%                                                               |
| T <sub>n</sub> | 1    | 2.7559      | H → L 46.3%, H-2 → L+1 11.5%, H-3 → L 7.8%, H-1 → L+1 6.3%, H → L+3 6.2%    |
|                | 2    | 2.8246      | H → L+1 34.6%, H-2 → L 15.0%, H-1 → L 12.7%, H-3 → L+1 11.4%                |
|                | 3    | 3.0505      | H-3 → L 30.8%, H-4 → L+1 19.5%, H-2 → L+1 10.0%, H-1 → L+2 7.2%, H → L 5.2% |
|                | 4    | 3.0953      | H-3 → L+1 22.0%, H-4 → L 20.9%, H → L+2 20.0%, H → L+1 10.4%                |
|                | 5    | 3.1989      | H → L+2 71.7%, H-4 → L 5.1%                                                 |
|                | 6    | 3.2749      | H-1 → L+2 51.5%, H → L 10.2%, H-2 → L+2 9.5%                                |

**Table S4** The energy levels and transition configurations of PhCzBP revealed by TD-DFT calculations.

| Excited States | n-th | Energy (eV) | Transition configurations (%)                                              |
|----------------|------|-------------|----------------------------------------------------------------------------|
| S <sub>n</sub> | 1    | 3.3184      | H → L 94.2%                                                                |
|                | 2    | 3.4409      | H → L+1 91.7%                                                              |
| T <sub>n</sub> | 1    | 2.7665      | H → L 43.5%, H-2 → L+1 12.3%, H-3 → L 8.8%, H-1 → L+1 6.6%, H → L+4 5.5%   |
|                | 2    | 2.8266      | H → L+1 33.7%, H-2 → L 14.6%, H-1 → L 12.4%, H-3 → L+1 11.6%               |
|                | 3    | 3.0531      | H-3 → L 29.6%, H-4 → L+1 19.4%, H-2 → L+1 9.4%, H-1 → L+2 6.6%, H → L 5.8% |
|                | 4    | 3.0961      | H-3 → L+1 22.2%, H-4 → L 22.0%, H → L+2 13.4%, H → L+1 11.8%               |
|                | 5    | 3.2330      | H → L+2 77.0%                                                              |
|                | 6    | 3.2900      | H-1 → L+2 49.5%, H → L 9.9%, H-2 → L+2 9.7%                                |

**Table S5** The energy levels and transition configurations of PhCzPM revealed by TD-DFT calculations.

| Excited States | n-th | Energy (eV) | Transition configurations (%)                                                 |
|----------------|------|-------------|-------------------------------------------------------------------------------|
| S <sub>n</sub> | 1    | 3.5840      | H → L 54.9%, H-3 → L 17.0%, H-2 → L+1 14.8%                                   |
| T <sub>n</sub> | 1    | 2.8793      | H → L 51.1%, H-2 → L+1 14.5%, H-1 → L+2 10.7%, H-3 → L 9.4%                   |
|                | 2    | 3.0011      | H-2 → L 39.9%, H → L+1 28.6%, H-3 → L+1 19.3%                                 |
|                | 3    | 3.1897      | H-3 → L 35.8%, H-2 → L+1 20.8%, H-1 → L+2 15.6%, H-8 → L+1 5.6%, H → L 5.2%   |
|                | 4    | 3.2987      | H → L+1 37.3%, H-3 → L+1 14.3%, H-2 → L 10.6%, H → L+2 10.2%, H-8 → L 8.9%    |
|                | 5    | 3.4778      | H-1 → L+2 38.7%, H → L 26.1%, H-1 → L+1 22.5%                                 |
|                | 6    | 3.4897      | H-1 → L 46.0%, H → L+2 33.8%                                                  |
|                | 7    | 3.5456      | H-7 → L 31.1%, H-6 → L+1 25.4%, H-5 → L+7 8.3%, H-4 → L+6 5.7%                |
|                | 8    | 3.5525      | H-6 → L 25.3%, H-7 → L+1 22.0%, H → L+2 10.0%, H-4 → L+7 7.6%, H-5 → L+6 5.7% |

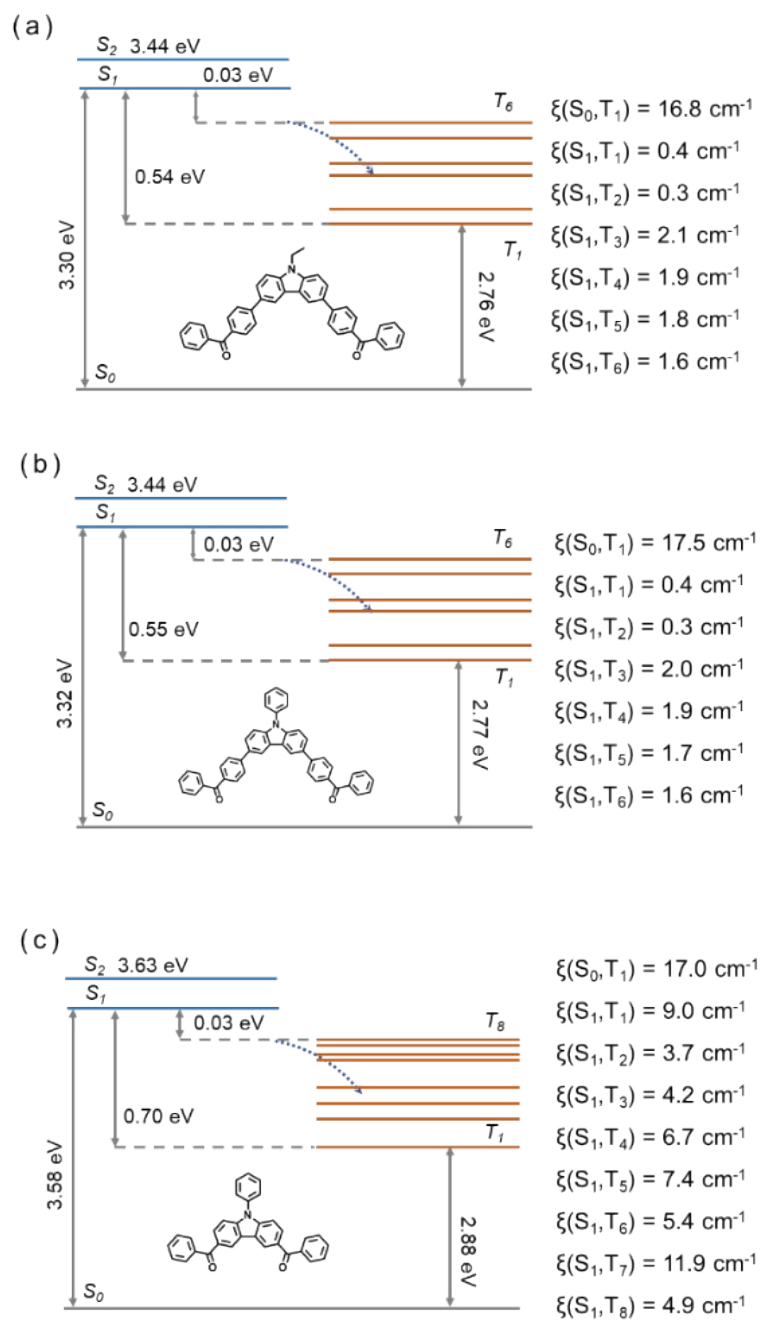

**Fig. S18.** The singlet ( $S_n$ ) and triplet ( $T_n$ ) state levels and the spin-orbit coupling constants of  $S_1 \rightarrow T_n$  and  $S_0 \rightarrow T_1$  for (a) EtCzBP, (b) PhCzBP and (c) PhCzPM.

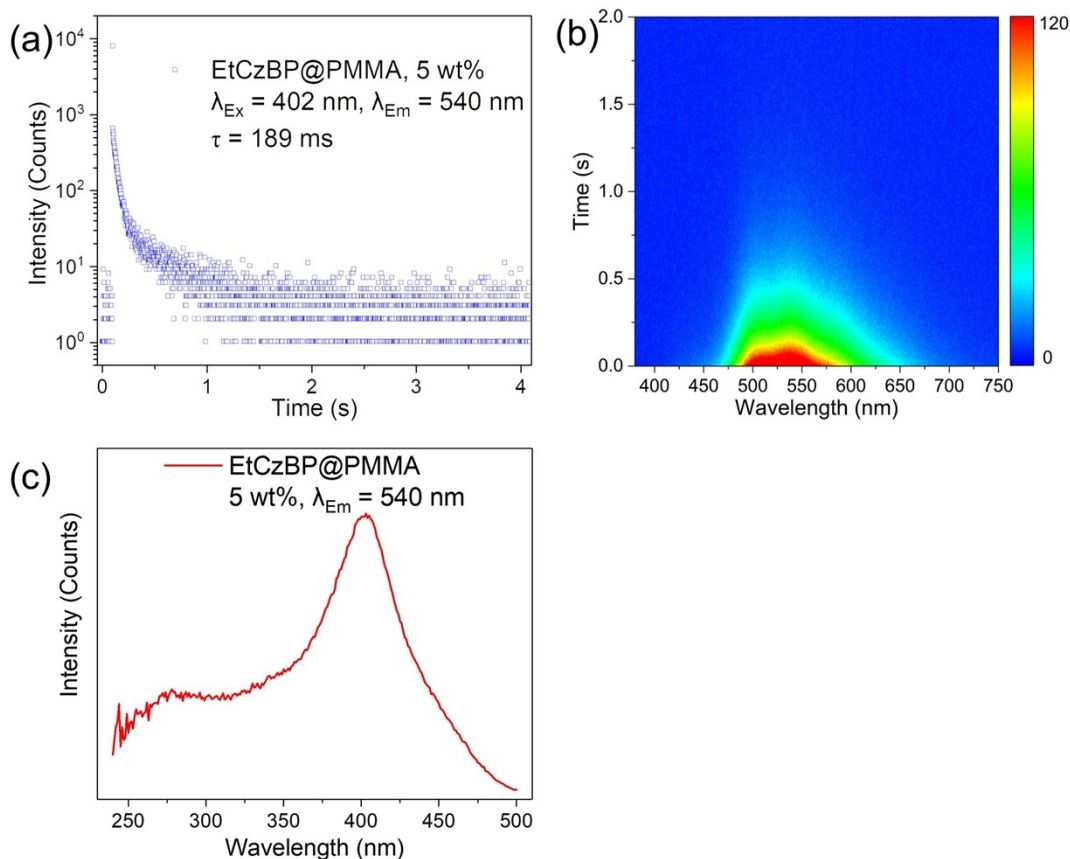

**Fig. S19.** Photophysical properties of EtCzBP@PMMA film with a concentration at 5 wt%. (a) Time-resolved PL-decay curves at the phosphorescence emission band of 540 nm. ( $\tau_{\text{int}}=189\pm 9.4$  ms,  $X^2=1.15$ ) (b) Transient PL decay image (delayed time = 8 ms). (c) Excitation spectrum at an emission band of 540 nm.

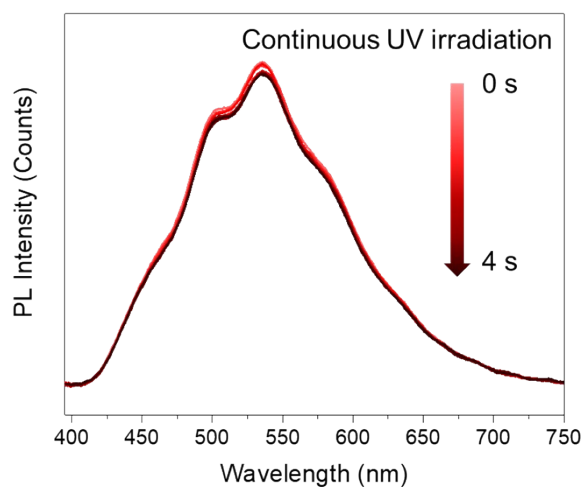

**Fig. S20.** Steady-state PL spectra of EtCzBP@PMMA films under sustaining UV light irradiation ( $\lambda_{\text{ex}} = 365$  nm) at 77 K.

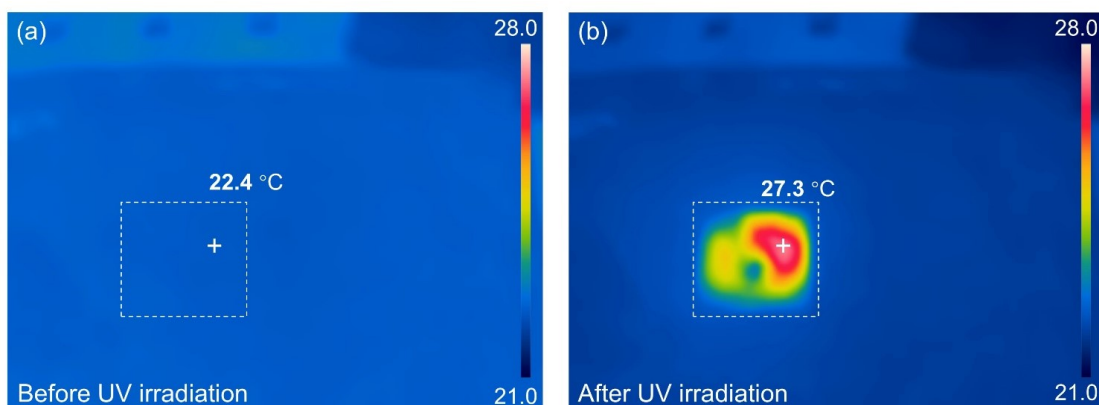

**Fig. S21.** Infrared images of EtCzBP@PMMA films before UV light irradiation and after sustaining UV light irradiation ( $\lambda_{\text{ex}} = 365 \text{ nm}$ ) under ambient condition.

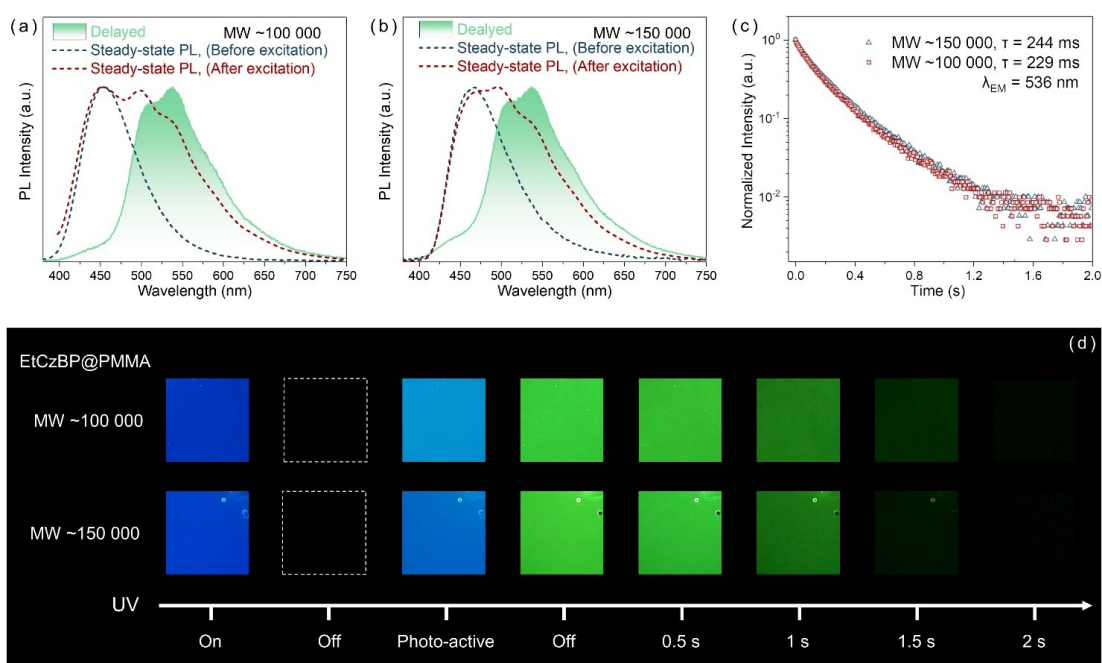

**Fig. S22.** The steady-state PL spectra before UV excitation and after UV excitation, and delayed (delayed time = 8 ms) spectra for EtCzBP@PMMA (The molecular weights of PMMA were ~150 000 (a) and 100 000 (b), respectively). (c) Time-resolved PL-decay curves at the phosphorescence emission band of 536 nm. (d) Photographs of the photo-active RTP of EtCzBP@PMMA with different molecular weights under the UV excitation ( $\lambda_{\text{ex}} = 365 \text{ nm}$ ).

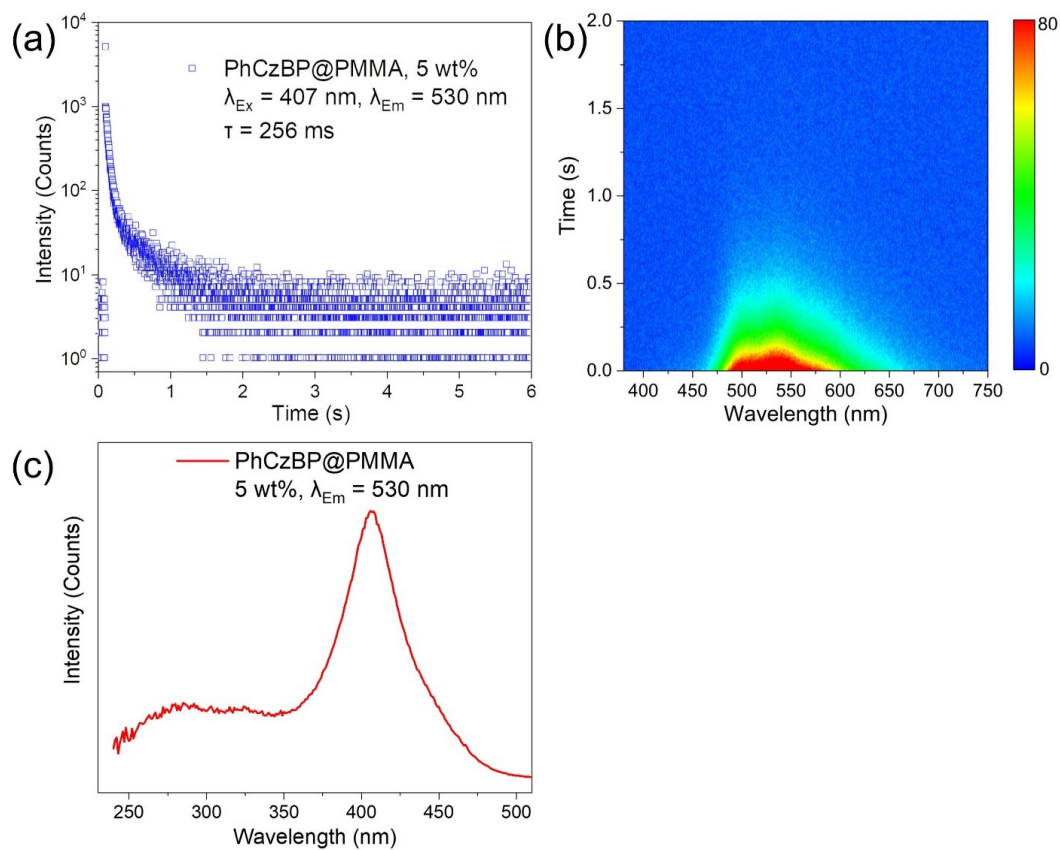

**Fig. S23.** Photophysical properties of PhCzBP@PMMA film with a concentration at 5 wt%. (a) Time-resolved PL-decay curves at the phosphorescence emission band of 530 nm. ( $\tau_{\text{int}}=256\pm 8.7$  ms,  $X^2=1.22$ ) (b) Transient PL decay image (delayed time = 8 ms). (c) Excitation spectrum at an emission band of 540 nm.



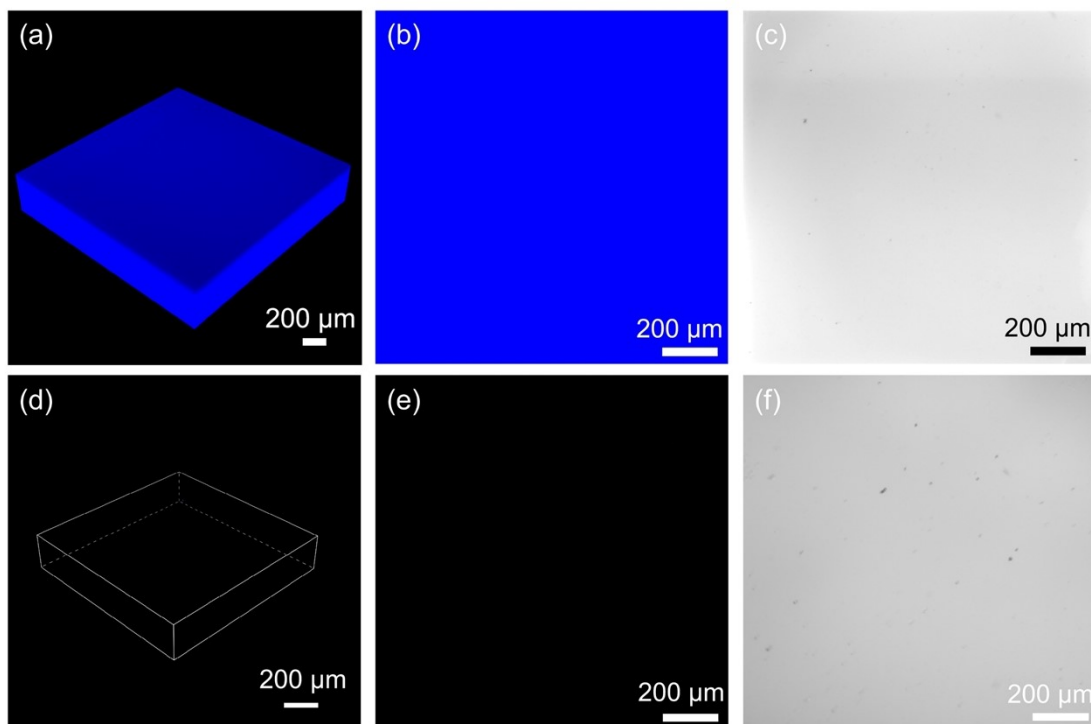

**Fig. S24.** Three-dimensional and planar laser scanning confocal microscopy (LSCM), and optical microscopy images of (a, b, c) EtCzBP@PMMA films and (d, e, f) pure PMMA films.

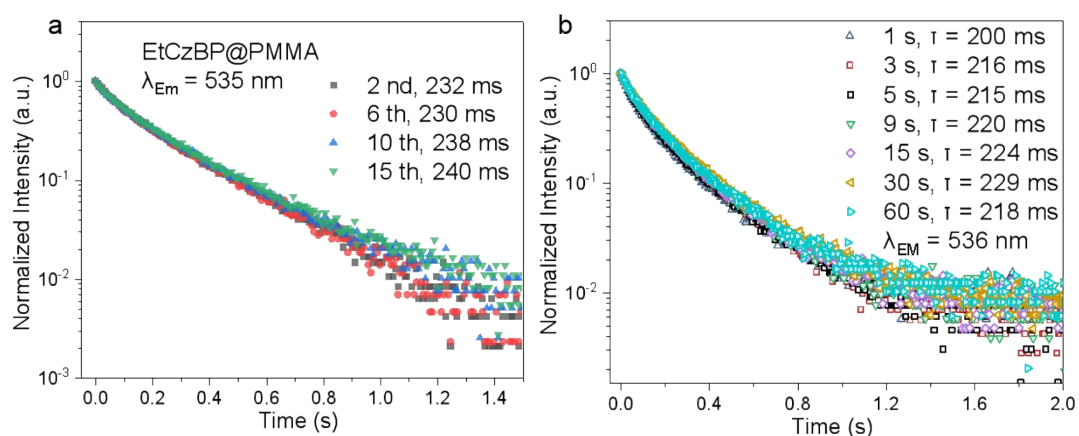

**Fig. S25.** Time-resolved PL-decay curves at the phosphorescent emission band of 535 nm (a) during the 2 nd, 6th, 10th, and 15th cycles of cyclic testing process. (b) different UV irradiation duration.

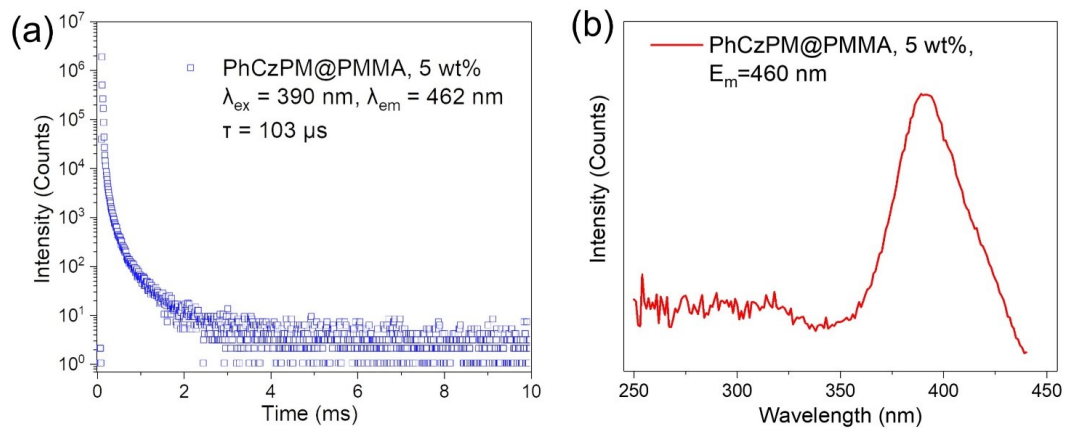

**Fig. S26.** Photophysical properties of PhCzPM@PMMA film with a concentration at 5 wt%. (a) Time-resolved PL-decay curves at the phosphorescence emission band of 462 nm. ( $\tau_{\text{int}}=103\pm 2.8\mu\text{s}$ ,  $X^2=1.36$ ) (b) Excitation spectrum at an emission band of 460 nm.

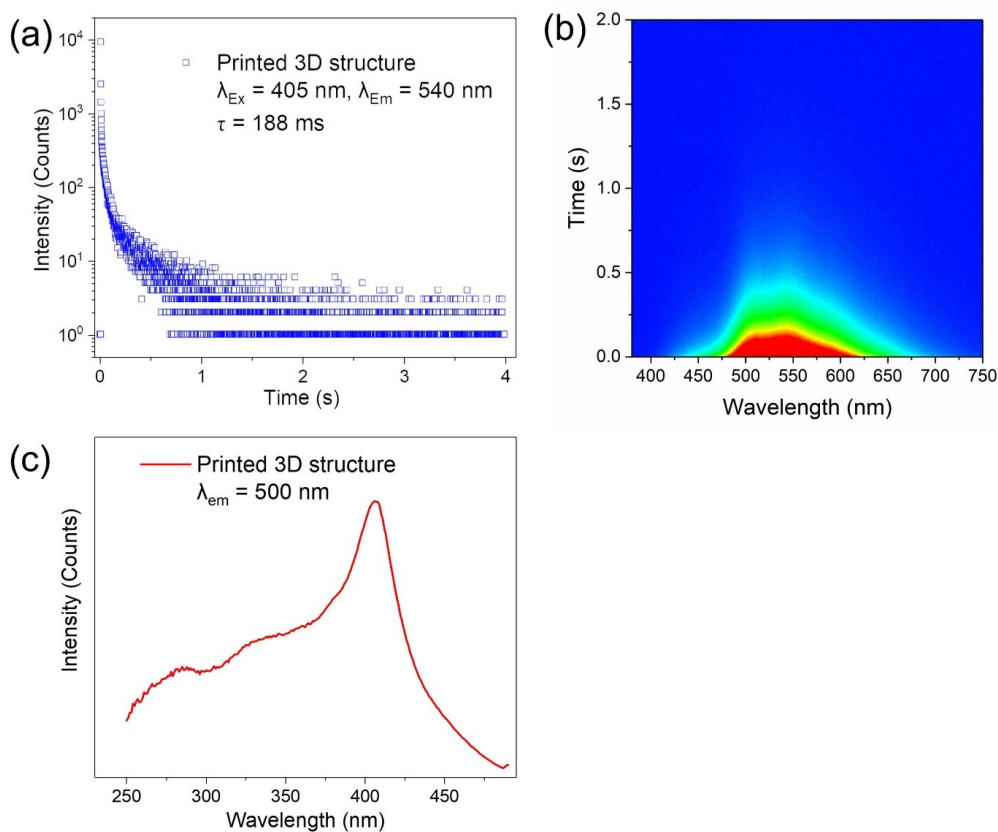

**Fig. S27.** Photophysical properties of printed 3D structures. (a) Time-resolved PL-decay curves at the phosphorescence emission band of 540 nm ( $\tau_{\text{int}}=188\pm 8.9\mu\text{s}$ ,

$X^2=1.10$ ). (b) Transient PL decay image (delayed time = 8 ms). (c) Excitation spectrum at an emission band of 500 nm.

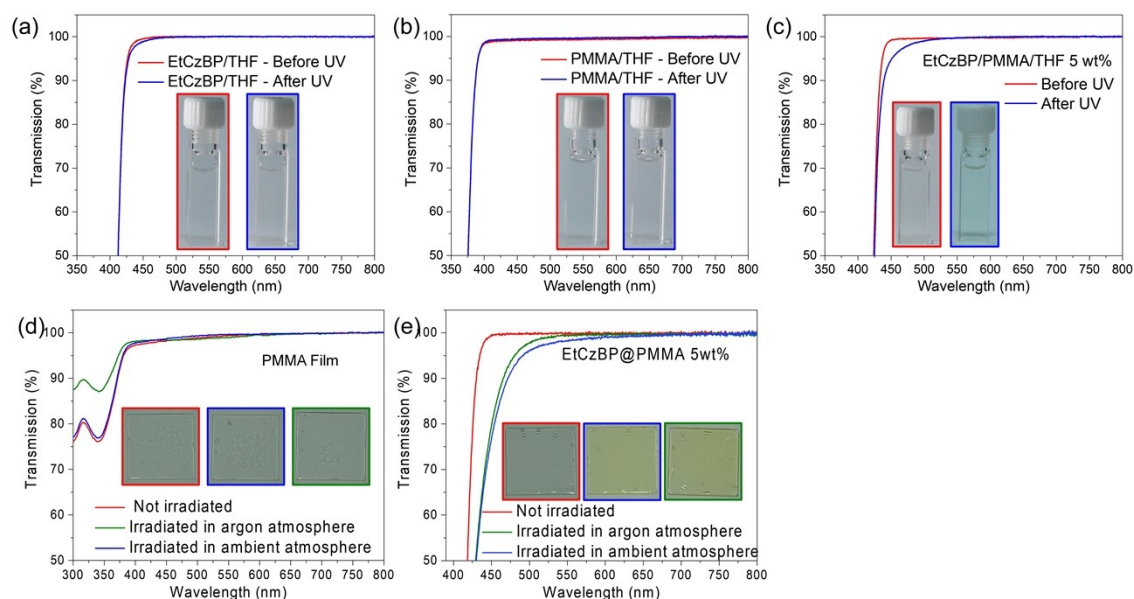

**Fig. S28.** Mechanisms of oxygen consumption during photoactivation. Transmission of cuvettes containing (a) EtCzBP, (b) PMMA and (c) PMMA/EtCzBP (5 wt%) in tetrahydrofuran ( $1 \times 10^{-5} \text{M}$ ) shown before and after illumination with UV light, inset: photographs of the cuvettes containing solutions. Transmission of drop casted (d) PMMA and (e) EtCzBP@PMMA (5 wt%) before illumination with UV light, and irradiation in argon and ambient atmosphere, inset: the corresponding photographs of each stage of the polymer films.

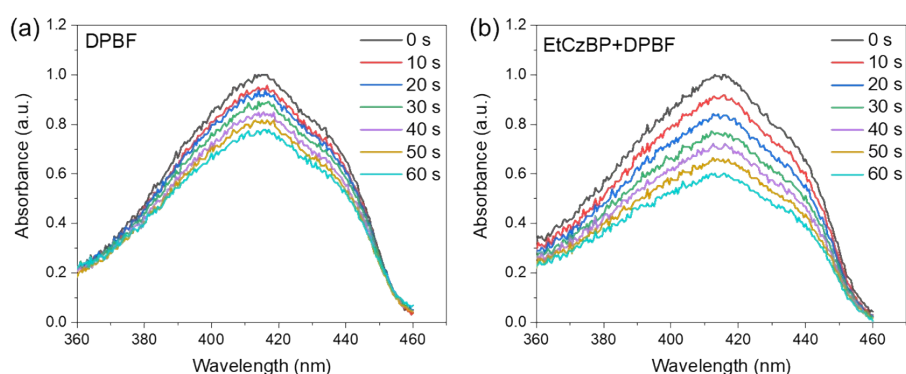

**Fig. S29.** Time-dependent absorbance of (a) DPBF and (b) EtCzBP&DPBF irradiated by 365 nm for various time. The absorbance of mixed solutions containing EtCzBP

and DPBF declined to 59% of their initial intensity under 365 nm photoirradiation for 60 s. In contrast, the absorbance of DPBF decreased to 77%, indicating that the triplet excitons of EtCzBP could interact with triplet oxygen through TTA process to accelerate the generation of excited singlet oxygen.

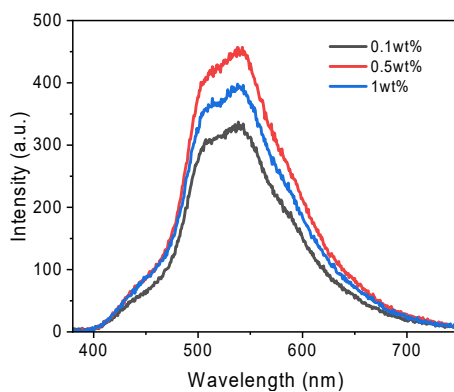

**Fig. S30.** Diverse RTP intensities at different doping concentrations of EtCzBP@PMMA.

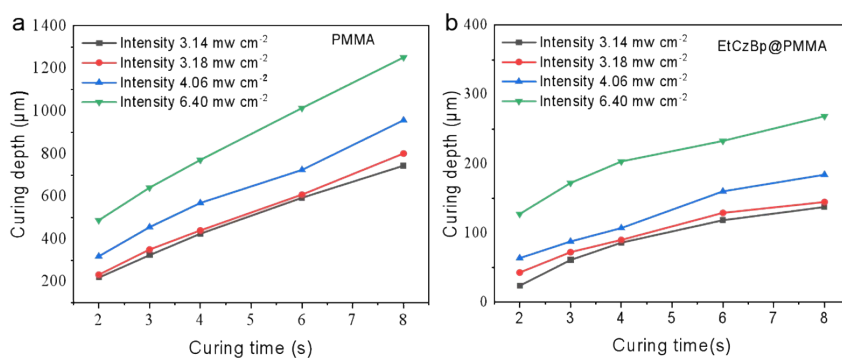

**Fig. S31.** The curing depth of (a)PMMA and (b)EtCzBP@PMMA (0.5 wt%) with different light source power power during the photocuring process.

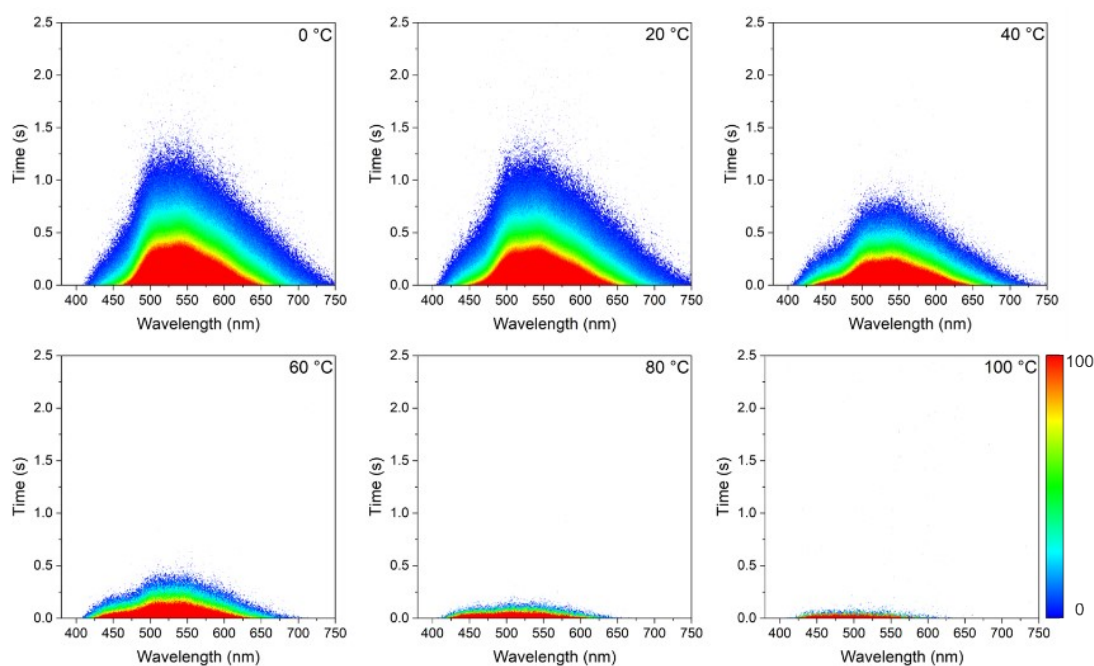

**Fig. S32.** Transient PL decay image (delayed time = 8 ms) for the cured printable resins at different temperatures ( $\lambda_{\text{ex}} = 365$  nm).

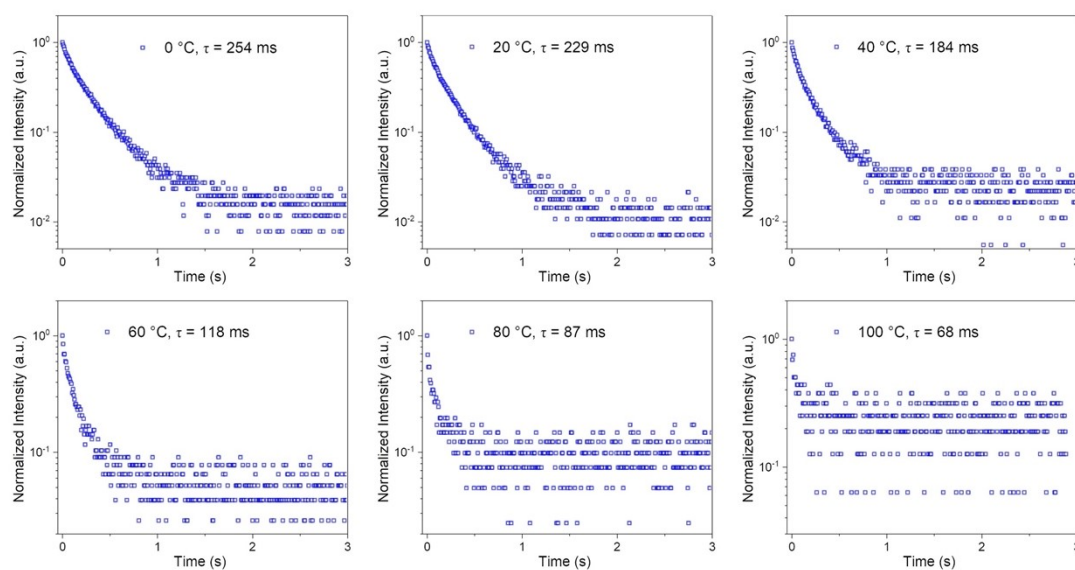

**Fig. S33.** Time-resolved PL-decay curves for the cured printable resins at the phosphorescence emission band of 536 nm.

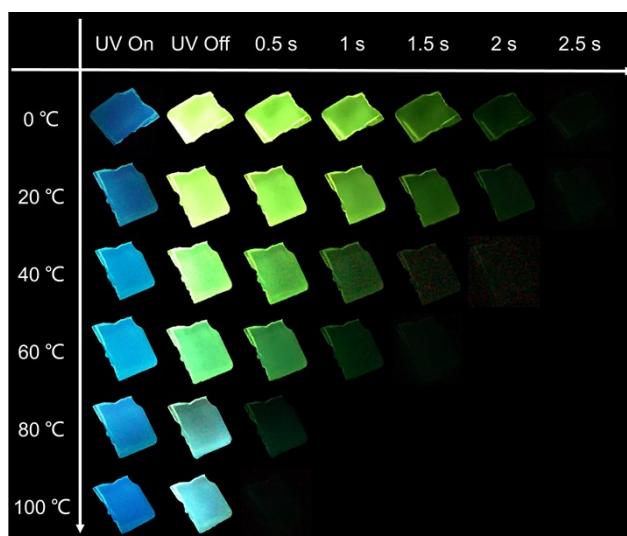

**Fig. S34.** Photographs of the cured printable resins under UV excitation and after termination of UV light at different temperatures.

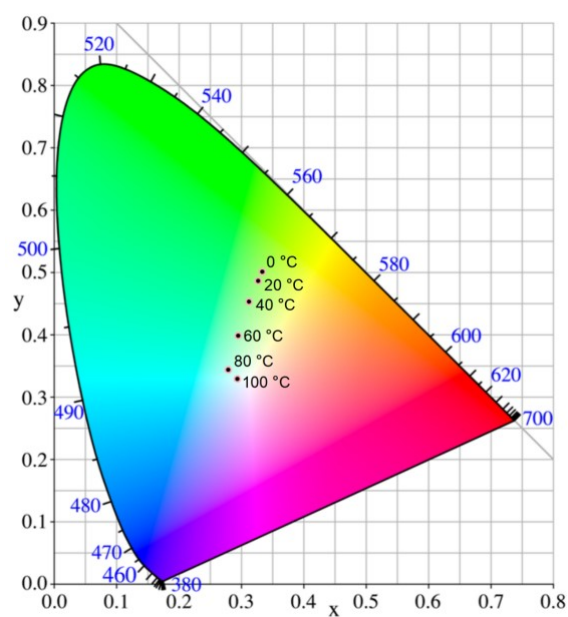

**Fig. S35.** CIE coordinates for the cured printable resins at different temperatures ( $\lambda_{\text{ex}} = 365 \text{ nm}$ ).

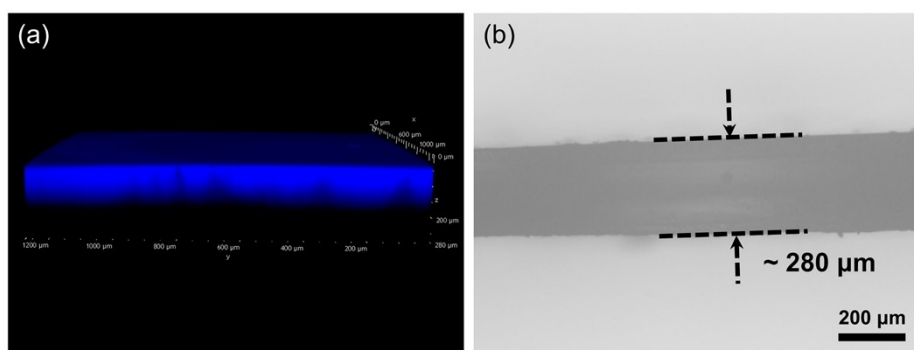



**Fig. S36.** (a) Three-dimensional laser scanning confocal microscopy (LSCM) under 405 nm excitation and (b) optical microscopy images of the 3D printed structures.

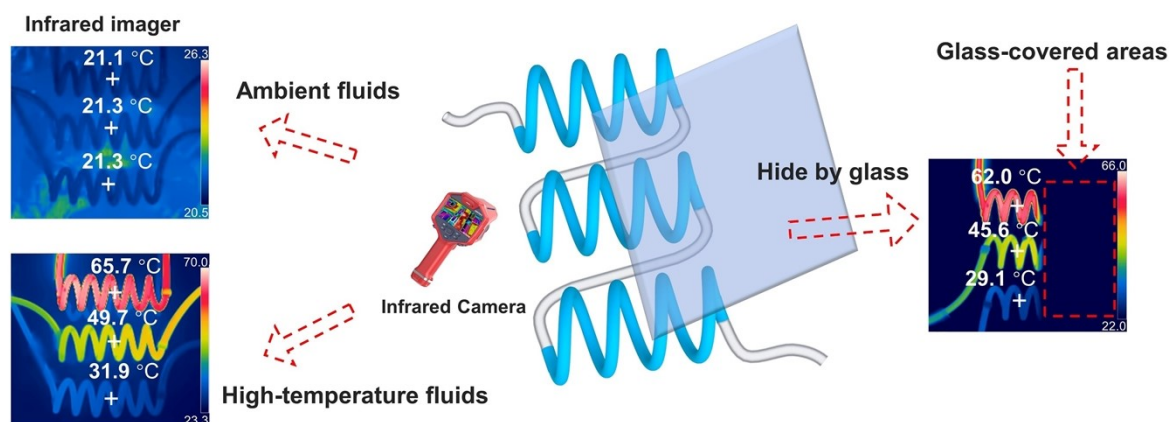

**Fig. S37.** Schematic diagram of the phosphorescence-based temperature real-time sensing structures transmitting temperature signals through transparent glass.

**Crystal data for EtCzBP:**  $C_{40}H_{29}NO_2$  ( $M = 555.64$  g/mol), orthorhombic, space group  $P2_12_12_1$ ,  $a = 7.70890(10)$  Å,  $b = 24.1610(2)$  Å,  $c = 30.3400(3)$  Å,  $\alpha = 90^\circ$ ,  $\beta = 90^\circ$ ,  $\gamma = 90^\circ$ ,  $V = 5650.97(10)$  Å<sup>3</sup>,  $Z = 8$ ,  $T = 100.00(10)$  K,  $\mu(\text{Cu K}\alpha) = 0.622$  mm<sup>-1</sup>,  $\rho_c = 1.306$  g/cm<sup>3</sup>, Reflections collected 38426, Independent reflections 11462 unique [ $R_{\text{int}} = 0.0369$ ,  $R_{\text{sigma}} = 0.0355$ ].  $R_1 = 0.0345$  ( $I > 2\sigma(I)$ ) and  $wR_2 = 0.0895$  (all data). GOF = 1.087.

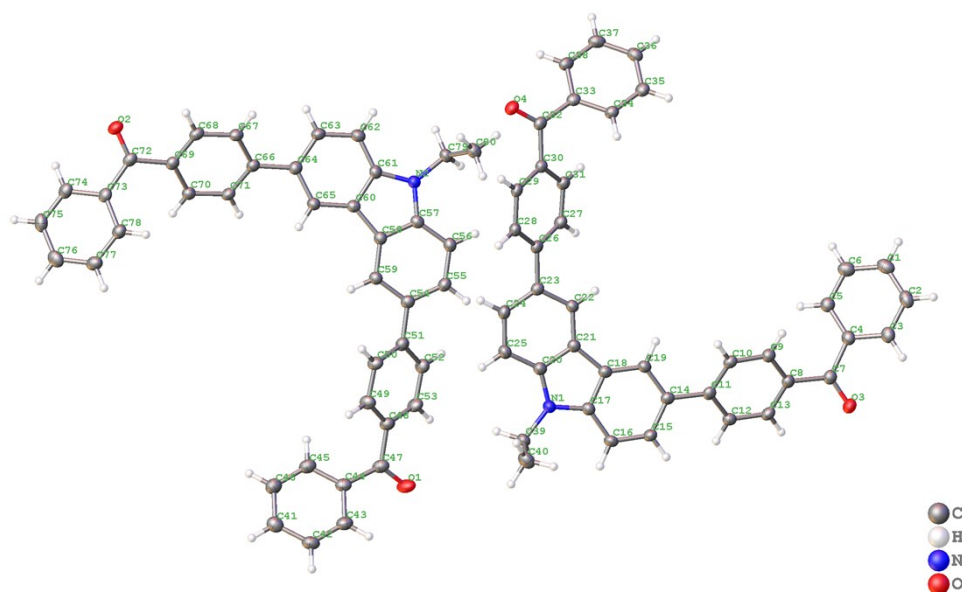

**Fig. S35.** Single crystal structure for EtCzBP.**Table S4.** Bond distance (Å) for EtCzBP.

| Atom | Atom | Length/Å | Atom | Atom | Length/Å |
|------|------|----------|------|------|----------|
| O4   | C32  | 1.223(2) | C20  | C25  | 1.398(3) |
| O2   | C72  | 1.225(2) | C7   | C4   | 1.497(3) |
| O3   | C7   | 1.219(3) | C70  | C69  | 1.402(3) |
| O1   | C47  | 1.220(3) | C65  | C64  | 1.392(3) |
| N2   | C57  | 1.379(3) | C11  | C14  | 1.480(3) |
| N2   | C61  | 1.387(3) | C11  | C10  | 1.399(3) |
| N2   | C79  | 1.462(2) | C11  | C12  | 1.409(3) |
| N1   | C17  | 1.378(3) | C14  | C15  | 1.413(3) |
| N1   | C20  | 1.383(3) | C22  | C21  | 1.388(3) |
| N1   | C39  | 1.459(2) | C24  | C25  | 1.389(3) |
| C58  | C57  | 1.412(3) | C69  | C68  | 1.389(3) |
| C58  | C59  | 1.388(3) | C15  | C16  | 1.382(3) |
| C58  | C60  | 1.444(3) | C64  | C66  | 1.482(3) |
| C17  | C18  | 1.409(3) | C64  | C63  | 1.415(3) |
| C17  | C16  | 1.397(3) | C54  | C55  | 1.410(3) |
| C28  | C29  | 1.388(3) | C54  | C51  | 1.480(3) |
| C28  | C26  | 1.399(3) | C73  | C78  | 1.396(3) |
| C57  | C56  | 1.397(3) | C73  | C74  | 1.401(3) |
| C18  | C19  | 1.386(3) | C13  | C12  | 1.381(3) |
| C18  | C21  | 1.443(3) | C48  | C47  | 1.494(3) |
| C32  | C33  | 1.498(3) | C48  | C49  | 1.395(3) |
| C32  | C30  | 1.496(3) | C48  | C53  | 1.399(3) |
| C67  | C68  | 1.384(3) | C44  | C47  | 1.502(3) |
| C67  | C66  | 1.405(3) | C44  | C43  | 1.396(3) |
| C33  | C34  | 1.395(3) | C44  | C45  | 1.395(3) |
| C33  | C38  | 1.392(3) | C78  | C77  | 1.395(3) |
| C71  | C70  | 1.385(3) | C49  | C50  | 1.385(3) |
| C71  | C66  | 1.395(3) | C51  | C52  | 1.400(3) |
| C8   | C9   | 1.404(3) | C51  | C50  | 1.397(3) |
| C8   | C7   | 1.493(3) | C38  | C37  | 1.390(3) |
| C8   | C13  | 1.398(3) | C74  | C75  | 1.386(3) |
| C27  | C31  | 1.380(3) | C62  | C63  | 1.383(3) |
| C27  | C26  | 1.403(3) | C36  | C35  | 1.386(3) |
| C30  | C29  | 1.402(3) | C36  | C37  | 1.391(3) |
| C30  | C31  | 1.394(3) | C2   | C3   | 1.390(3) |



|     |     |          |     |     |          |
|-----|-----|----------|-----|-----|----------|
| C59 | C54 | 1.394(3) | C2  | C1  | 1.391(3) |
| C23 | C22 | 1.393(3) | C79 | C80 | 1.512(3) |
| C23 | C24 | 1.411(3) | C3  | C4  | 1.397(3) |
| C23 | C26 | 1.480(3) | C52 | C53 | 1.380(3) |
| C60 | C61 | 1.413(3) | C4  | C5  | 1.404(3) |
| C60 | C65 | 1.393(3) | C5  | C6  | 1.390(3) |
| C34 | C35 | 1.389(3) | C77 | C76 | 1.386(3) |
| C72 | C69 | 1.493(3) | C43 | C42 | 1.385(3) |
| C72 | C73 | 1.497(3) | C45 | C46 | 1.392(3) |
| C19 | C14 | 1.393(3) | C1  | C6  | 1.386(4) |
| C9  | C10 | 1.383(3) | C39 | C40 | 1.518(3) |
| C61 | C62 | 1.394(3) | C75 | C76 | 1.387(3) |
| C56 | C55 | 1.385(3) | C42 | C41 | 1.390(3) |
| C20 | C21 | 1.412(3) | C41 | C46 | 1.388(3) |

**Table S5.** Bond Angles for EtCzBP.

| Atom | Atom | Atom | Angle/°    | Atom | Atom | Atom | Angle/°    |
|------|------|------|------------|------|------|------|------------|
| C57  | N2   | C61  | 108.76(17) | C70  | C69  | C72  | 123.14(19) |
| C57  | N2   | C79  | 124.09(17) | C68  | C69  | C72  | 118.14(18) |
| C61  | N2   | C79  | 126.98(17) | C68  | C69  | C70  | 118.66(19) |
| C17  | N1   | C20  | 108.74(17) | C20  | C21  | C18  | 107.09(18) |
| C17  | N1   | C39  | 124.23(17) | C22  | C21  | C18  | 132.90(19) |
| C20  | N1   | C39  | 126.74(17) | C22  | C21  | C20  | 120.00(18) |
| C57  | C58  | C60  | 106.33(18) | C16  | C15  | C14  | 122.67(19) |
| C59  | C58  | C57  | 119.91(18) | C67  | C68  | C69  | 121.03(19) |
| C59  | C58  | C60  | 133.6(2)   | C65  | C64  | C66  | 119.89(18) |
| N1   | C17  | C18  | 109.67(18) | C65  | C64  | C63  | 118.92(19) |
| N1   | C17  | C16  | 129.44(19) | C63  | C64  | C66  | 121.19(18) |
| C16  | C17  | C18  | 120.90(19) | C28  | C26  | C27  | 117.41(19) |
| C29  | C28  | C26  | 121.20(19) | C28  | C26  | C23  | 123.09(19) |
| N2   | C57  | C58  | 109.34(18) | C27  | C26  | C23  | 119.42(18) |
| N2   | C57  | C56  | 129.40(19) | C59  | C54  | C55  | 119.20(19) |
| C56  | C57  | C58  | 121.22(19) | C59  | C54  | C51  | 119.55(19) |
| C17  | C18  | C21  | 105.91(18) | C55  | C54  | C51  | 121.21(18) |
| C19  | C18  | C17  | 120.36(19) | C78  | C73  | C72  | 122.95(19) |
| C19  | C18  | C21  | 133.73(19) | C78  | C73  | C74  | 119.2(2)   |
| O4   | C32  | C33  | 120.68(18) | C74  | C73  | C72  | 117.82(19) |
| O4   | C32  | C30  | 120.69(19) | C12  | C13  | C8   | 120.67(19) |
| C30  | C32  | C33  | 118.58(17) | C49  | C48  | C47  | 122.74(19) |

|     |     |     |            |     |     |     |            |
|-----|-----|-----|------------|-----|-----|-----|------------|
| C68 | C67 | C66 | 120.83(19) | C49 | C48 | C53 | 118.15(19) |
| C34 | C33 | C32 | 121.28(18) | C53 | C48 | C47 | 119.07(19) |
| C38 | C33 | C32 | 119.04(18) | C43 | C44 | C47 | 118.0(2)   |
| C38 | C33 | C34 | 119.67(19) | C45 | C44 | C47 | 122.67(19) |
| C70 | C71 | C66 | 121.66(18) | C45 | C44 | C43 | 119.2(2)   |
| C9  | C8  | C7  | 122.82(19) | C15 | C16 | C17 | 117.61(19) |
| C13 | C8  | C9  | 118.51(19) | C24 | C25 | C20 | 117.99(19) |
| C13 | C8  | C7  | 118.53(18) | C77 | C78 | C73 | 120.0(2)   |
| C31 | C27 | C26 | 121.61(19) | C67 | C66 | C64 | 121.35(19) |
| C29 | C30 | C32 | 119.71(18) | C71 | C66 | C67 | 117.67(19) |
| C31 | C30 | C32 | 121.65(18) | C71 | C66 | C64 | 120.97(18) |
| C31 | C30 | C29 | 118.30(18) | O1  | C47 | C48 | 119.6(2)   |
| C58 | C59 | C54 | 119.77(19) | O1  | C47 | C44 | 119.8(2)   |
| C22 | C23 | C24 | 119.07(18) | C48 | C47 | C44 | 120.67(18) |
| C22 | C23 | C26 | 118.69(18) | C56 | C55 | C54 | 122.21(19) |
| C24 | C23 | C26 | 122.23(18) | C50 | C49 | C48 | 120.6(2)   |
| C61 | C60 | C58 | 106.74(18) | C52 | C51 | C54 | 121.98(19) |
| C65 | C60 | C58 | 133.33(19) | C50 | C51 | C54 | 120.31(18) |
| C65 | C60 | C61 | 119.90(19) | C50 | C51 | C52 | 117.65(19) |
| C35 | C34 | C33 | 120.40(19) | C13 | C12 | C11 | 121.4(2)   |
| O2  | C72 | C69 | 119.74(19) | C37 | C38 | C33 | 120.0(2)   |
| O2  | C72 | C73 | 119.87(19) | C75 | C74 | C73 | 120.6(2)   |
| C69 | C72 | C73 | 120.38(17) | C63 | C62 | C61 | 118.27(19) |
| C18 | C19 | C14 | 119.87(19) | C35 | C36 | C37 | 120.5(2)   |
| C10 | C9  | C8  | 120.35(19) | C3  | C2  | C1  | 119.8(2)   |
| C28 | C29 | C30 | 120.66(18) | N2  | C79 | C80 | 112.34(18) |
| C27 | C31 | C30 | 120.77(19) | C36 | C35 | C34 | 119.5(2)   |
| N2  | C61 | C60 | 108.81(18) | C2  | C3  | C4  | 120.4(2)   |
| N2  | C61 | C62 | 130.32(19) | C53 | C52 | C51 | 121.0(2)   |
| C62 | C61 | C60 | 120.85(19) | C62 | C63 | C64 | 122.03(19) |
| C55 | C56 | C57 | 117.62(19) | C49 | C50 | C51 | 121.43(19) |
| N1  | C20 | C21 | 108.56(17) | C3  | C4  | C7  | 118.19(19) |
| N1  | C20 | C25 | 130.59(19) | C3  | C4  | C5  | 119.4(2)   |
| C25 | C20 | C21 | 120.84(19) | C5  | C4  | C7  | 122.35(19) |
| O3  | C7  | C8  | 120.02(19) | C6  | C5  | C4  | 119.7(2)   |
| O3  | C7  | C4  | 120.03(19) | C52 | C53 | C48 | 121.1(2)   |
| C8  | C7  | C4  | 119.95(18) | C76 | C77 | C78 | 119.9(2)   |
| C71 | C70 | C69 | 120.10(19) | C42 | C43 | C44 | 120.4(2)   |
| C64 | C65 | C60 | 120.02(19) | C46 | C45 | C44 | 120.2(2)   |
| C10 | C11 | C14 | 121.34(18) | C38 | C37 | C36 | 119.8(2)   |
| C10 | C11 | C12 | 117.31(19) | C6  | C1  | C2  | 120.2(2)   |

|     |     |     |            |     |     |     |            |
|-----|-----|-----|------------|-----|-----|-----|------------|
| C12 | C11 | C14 | 121.32(19) | N1  | C39 | C40 | 112.33(19) |
| C19 | C14 | C11 | 120.69(18) | C74 | C75 | C76 | 119.6(2)   |
| C19 | C14 | C15 | 118.58(19) | C43 | C42 | C41 | 120.4(2)   |
| C15 | C14 | C11 | 120.71(18) | C77 | C76 | C75 | 120.6(2)   |
| C21 | C22 | C23 | 120.07(19) | C1  | C6  | C5  | 120.4(2)   |
| C9  | C10 | C11 | 121.69(19) | C46 | C41 | C42 | 119.6(2)   |
| C25 | C24 | C23 | 121.99(19) | C41 | C46 | C45 | 120.3(2)   |

**Crystal data for PhCzBP:**  $C_{44}H_{29}NO_2$  ( $M = 603.68$  g/mol), monoclinic, space group  $P2_1/c$ ,  $a = 15.739(2)$  Å,  $b = 16.068(2)$  Å,  $c = 13.9254(19)$  Å,  $\alpha = 90^\circ$ ,  $\beta = 107.433(2)^\circ$ ,  $\gamma = 90^\circ$ ,  $V = 3359.9(8)$  Å<sup>3</sup>,  $Z = 4$ ,  $T = 296.15$  K,  $\mu(\text{MoK}\alpha) = 0.072$  mm<sup>-1</sup>,  $\rho_c = 1.193$  g/cm<sup>3</sup>, Reflections collected 19309, Independent reflections 7549 unique [ $R_{\text{int}} = 0.0675$ ,  $R_{\text{sigma}} = 0.1083$ ].  $R_1 = 0.0791$  ( $I > 2\sigma(I)$ ) and  $wR_2 = 0.2976$  (all data). GOF = 0.936.

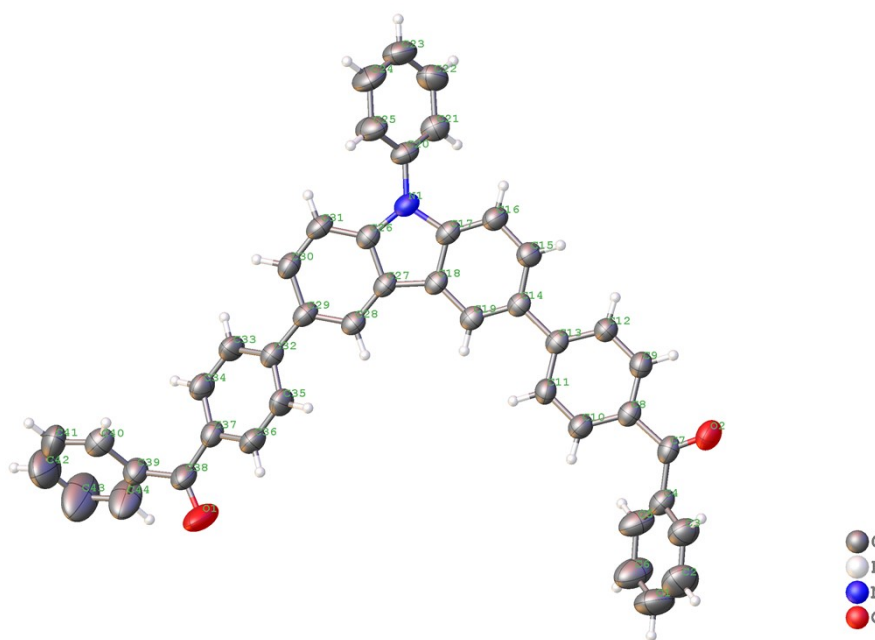

**Fig. S36.** Single crystal structure for PhCzBP.

**Table S6.** Bond distance (Å) for PhCzBP.

| Atom | Atom | Length/Å | Atom | Atom | Length/Å |
|------|------|----------|------|------|----------|
| N1   | C17  | 1.391(4) | C37  | C34  | 1.397(5) |
| N1   | C26  | 1.396(4) | C37  | C36  | 1.396(5) |
| N1   | C20  | 1.425(4) | C37  | C38  | 1.477(5) |
| O2   | C7   | 1.232(4) | C20  | C21  | 1.381(5) |
| C18  | C27  | 1.440(5) | C20  | C25  | 1.371(5) |
| C18  | C19  | 1.395(5) | C15  | C16  | 1.373(5) |
| C18  | C17  | 1.414(5) | C31  | C30  | 1.368(5) |
| C14  | C19  | 1.388(5) | C4   | C3   | 1.369(6) |
| C14  | C13  | 1.485(5) | C4   | C5   | 1.386(6) |
| C14  | C15  | 1.408(5) | C33  | C34  | 1.374(5) |
| C27  | C28  | 1.389(5) | O1   | C38  | 1.222(5) |
| C27  | C26  | 1.397(5) | C35  | C36  | 1.373(5) |
| C8   | C7   | 1.482(5) | C21  | C22  | 1.377(5) |
| C8   | C10  | 1.389(5) | C39  | C38  | 1.482(6) |
| C8   | C9   | 1.382(5) | C39  | C40  | 1.369(6) |
| C13  | C11  | 1.397(5) | C39  | C44  | 1.372(6) |
| C13  | C12  | 1.386(5) | C3   | C2   | 1.350(6) |
| C28  | C29  | 1.370(5) | C40  | C41  | 1.388(6) |
| C17  | C16  | 1.381(5) | C25  | C24  | 1.383(6) |
| C26  | C31  | 1.395(5) | C22  | C23  | 1.361(7) |
| C32  | C29  | 1.483(5) | C5   | C6   | 1.378(6) |
| C32  | C33  | 1.394(5) | C23  | C24  | 1.371(7) |
| C32  | C35  | 1.395(5) | C41  | C42  | 1.370(8) |
| C29  | C30  | 1.412(5) | C2   | C1   | 1.373(8) |
| C11  | C10  | 1.378(5) | C6   | C1   | 1.367(9) |
| C7   | C4   | 1.463(5) | C44  | C43  | 1.383(9) |
| C12  | C9   | 1.377(5) | C42  | C43  | 1.359(9) |

**Table S7.** Bond Angles for PhCzBP.

| Atom | Atom | Atom | Angle/°  | Atom | Atom | Atom | Angle/°  |
|------|------|------|----------|------|------|------|----------|
| C17  | N1   | C26  | 108.0(3) | C36  | C37  | C34  | 117.7(3) |
| C17  | N1   | C20  | 125.7(3) | C36  | C37  | C38  | 119.3(4) |
| C26  | N1   | C20  | 126.1(3) | C21  | C20  | N1   | 119.9(3) |
| C19  | C18  | C27  | 133.3(3) | C25  | C20  | N1   | 119.7(4) |
| C19  | C18  | C17  | 119.8(3) | C25  | C20  | C21  | 120.3(4) |
| C17  | C18  | C27  | 106.8(3) | C16  | C15  | C14  | 123.7(3) |
| C19  | C14  | C13  | 121.0(3) | C30  | C31  | C26  | 118.0(3) |
| C19  | C14  | C15  | 117.5(3) | C12  | C9   | C8   | 121.6(4) |
| C15  | C14  | C13  | 121.5(3) | C31  | C30  | C29  | 122.7(3) |

|     |     |     |          |     |     |     |          |
|-----|-----|-----|----------|-----|-----|-----|----------|
| C28 | C27 | C18 | 133.1(3) | C3  | C4  | C7  | 118.3(4) |
| C28 | C27 | C26 | 120.0(3) | C3  | C4  | C5  | 118.6(4) |
| C26 | C27 | C18 | 106.9(3) | C5  | C4  | C7  | 123.0(4) |
| C14 | C19 | C18 | 120.4(3) | C15 | C16 | C17 | 117.9(3) |
| C10 | C8  | C7  | 123.4(3) | C34 | C33 | C32 | 122.2(4) |
| C9  | C8  | C7  | 119.2(3) | C33 | C34 | C37 | 120.5(4) |
| C9  | C8  | C10 | 117.4(3) | C36 | C35 | C32 | 121.8(4) |
| C11 | C13 | C14 | 121.4(3) | C22 | C21 | C20 | 119.3(4) |
| C12 | C13 | C14 | 122.2(3) | C35 | C36 | C37 | 121.1(4) |
| C12 | C13 | C11 | 116.3(3) | C40 | C39 | C38 | 122.5(4) |
| C29 | C28 | C27 | 120.6(3) | C40 | C39 | C44 | 118.3(4) |
| N1  | C17 | C18 | 108.8(3) | C44 | C39 | C38 | 119.0(4) |
| C16 | C17 | N1  | 130.6(3) | C37 | C38 | C39 | 121.6(4) |
| C16 | C17 | C18 | 120.6(3) | O1  | C38 | C37 | 119.3(4) |
| N1  | C26 | C27 | 109.5(3) | O1  | C38 | C39 | 119.0(4) |
| C31 | C26 | N1  | 130.1(3) | C2  | C3  | C4  | 121.7(5) |
| C31 | C26 | C27 | 120.5(3) | C39 | C40 | C41 | 120.5(5) |
| C33 | C32 | C29 | 122.5(3) | C20 | C25 | C24 | 119.3(4) |
| C33 | C32 | C35 | 116.7(3) | C23 | C22 | C21 | 121.0(5) |
| C35 | C32 | C29 | 120.8(3) | C6  | C5  | C4  | 119.9(5) |
| C28 | C29 | C32 | 120.9(3) | C22 | C23 | C24 | 119.5(4) |
| C28 | C29 | C30 | 118.2(3) | C23 | C24 | C25 | 120.6(5) |
| C30 | C29 | C32 | 120.8(3) | C42 | C41 | C40 | 120.0(5) |
| C10 | C11 | C13 | 122.0(3) | C3  | C2  | C1  | 119.9(5) |
| O2  | C7  | C8  | 119.4(4) | C1  | C6  | C5  | 120.1(6) |
| O2  | C7  | C4  | 117.4(3) | C6  | C1  | C2  | 119.9(5) |
| C4  | C7  | C8  | 123.2(3) | C39 | C44 | C43 | 121.6(6) |
| C11 | C10 | C8  | 120.8(3) | C43 | C42 | C41 | 120.2(6) |
| C9  | C12 | C13 | 121.8(3) | C42 | C43 | C44 | 119.3(6) |
| C34 | C37 | C38 | 122.9(4) |     |     |     |          |

**Crystal data for PhCzPM:**  $C_{33}H_{23}Cl_2NO_2$  ( $M = 536.42$  g/mol), monoclinic, space group  $P2_1/c$ ,  $a = 12.8697(6)$  Å,  $b = 26.1356(9)$  Å,  $c = 7.9805(3)$  Å,  $\alpha = 90^\circ$ ,  $\beta = 107.143(4)^\circ$ ,  $\gamma = 90^\circ$ ,  $V = 2565.04(18)$  Å<sup>3</sup>,  $Z = 4$ ,  $T = 100.00(10)$  K,  $\mu(\text{Mo K}\alpha) = 0.286$  mm<sup>-1</sup>,  $\rho_c = 1.389$  g/cm<sup>3</sup>, Reflections collected 16607, Independent reflections 5587 unique [ $R_{\text{int}} = 0.0310$ ,  $R_{\text{sigma}} = 0.0411$ ].  $R_1 = 0.0589$  ( $I > 2\sigma(I)$ ) and  $wR_2 = 0.1832$  (all data). GOF = 1.057.

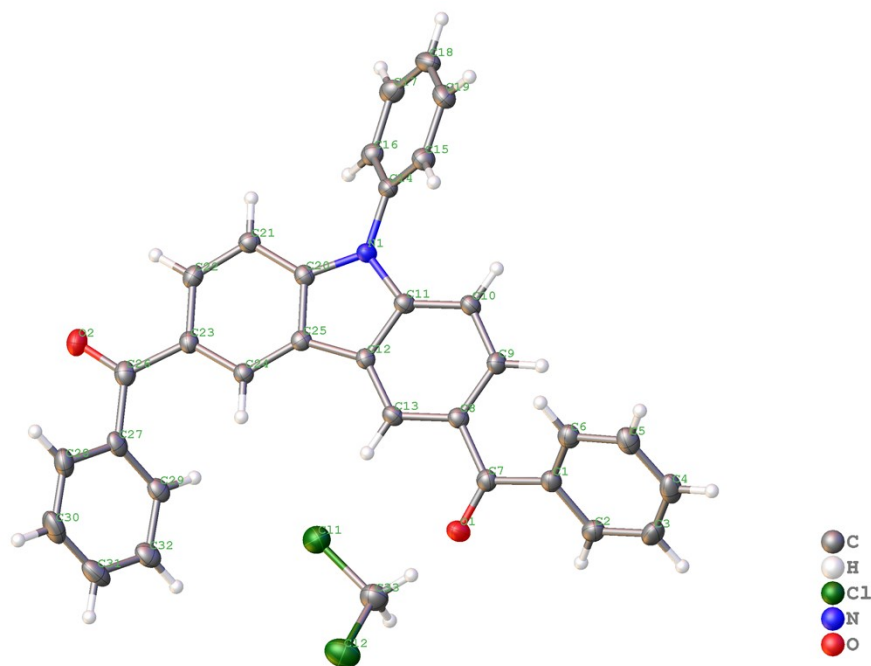

**Fig. S37.** Single crystal structure for PhCzPM.

**Table S8.** Bond distance (Å) for PhCzPM.

| Atom | Atom | Length/Å | Atom | Atom | Length/Å |
|------|------|----------|------|------|----------|
| C11  | C33  | 1.769(3) | C9   | C10  | 1.390(3) |
| C12  | C33  | 1.765(3) | C8   | C7   | 1.490(3) |
| O1   | C7   | 1.226(3) | C23  | C26  | 1.488(4) |
| O2   | C26  | 1.228(3) | C7   | C1   | 1.496(4) |
| N1   | C20  | 1.388(3) | C2   | C1   | 1.395(4) |
| N1   | C11  | 1.393(3) | C2   | C3   | 1.380(4) |
| N1   | C14  | 1.435(3) | C27  | C29  | 1.388(4) |
| C20  | C25  | 1.409(3) | C27  | C26  | 1.503(4) |
| C20  | C21  | 1.406(3) | C27  | C28  | 1.401(4) |
| C13  | C12  | 1.388(3) | C1   | C6   | 1.394(4) |
| C13  | C8   | 1.395(4) | C16  | C17  | 1.383(4) |
| C25  | C12  | 1.447(3) | C29  | C32  | 1.395(4) |
| C25  | C24  | 1.388(4) | C6   | C5   | 1.390(4) |
| C12  | C11  | 1.418(3) | C15  | C19  | 1.384(4) |
| C11  | C10  | 1.393(4) | C19  | C18  | 1.393(4) |
| C14  | C16  | 1.396(3) | C32  | C31  | 1.383(4) |
| C14  | C15  | 1.385(4) | C5   | C4   | 1.379(4) |
| C24  | C23  | 1.399(3) | C3   | C4   | 1.393(5) |
| C21  | C22  | 1.375(4) | C17  | C18  | 1.390(4) |

|     |     |          |     |     |          |
|-----|-----|----------|-----|-----|----------|
| C22 | C23 | 1.418(3) | C28 | C30 | 1.385(4) |
| C9  | C8  | 1.412(4) | C31 | C30 | 1.381(5) |

**Table S9.** Bond Angles for PhCzPM.

| Atom | Atom | Atom | Angle/°  | Atom | Atom | Atom | Angle/°    |
|------|------|------|----------|------|------|------|------------|
| C20  | N1   | C11  | 108.2(2) | C22  | C23  | C26  | 117.7(2)   |
| C20  | N1   | C14  | 126.5(2) | O1   | C7   | C8   | 121.2(2)   |
| C11  | N1   | C14  | 125.1(2) | O1   | C7   | C1   | 119.4(2)   |
| N1   | C20  | C25  | 109.8(2) | C8   | C7   | C1   | 119.4(2)   |
| N1   | C20  | C21  | 129.4(2) | C3   | C2   | C1   | 119.6(3)   |
| C21  | C20  | C25  | 120.8(2) | C29  | C27  | C26  | 122.9(2)   |
| C12  | C13  | C8   | 119.5(2) | C29  | C27  | C28  | 119.7(3)   |
| C20  | C25  | C12  | 106.3(2) | C28  | C27  | C26  | 117.4(2)   |
| C24  | C25  | C20  | 120.6(2) | C2   | C1   | C7   | 118.2(2)   |
| C24  | C25  | C12  | 133.1(2) | C6   | C1   | C7   | 122.2(2)   |
| C13  | C12  | C25  | 133.6(2) | C6   | C1   | C2   | 119.6(2)   |
| C13  | C12  | C11  | 119.5(2) | C17  | C16  | C14  | 119.4(3)   |
| C11  | C12  | C25  | 106.9(2) | C27  | C29  | C32  | 120.2(3)   |
| N1   | C11  | C12  | 108.8(2) | O2   | C26  | C23  | 120.9(2)   |
| C10  | C11  | N1   | 129.2(2) | O2   | C26  | C27  | 118.2(2)   |
| C10  | C11  | C12  | 121.9(2) | C23  | C26  | C27  | 120.9(2)   |
| C16  | C14  | N1   | 119.7(2) | C5   | C6   | C1   | 120.0(3)   |
| C15  | C14  | N1   | 119.6(2) | C19  | C15  | C14  | 119.5(2)   |
| C15  | C14  | C16  | 120.7(2) | C15  | C19  | C18  | 120.3(3)   |
| C25  | C24  | C23  | 119.2(2) | C31  | C32  | C29  | 119.7(3)   |
| C22  | C21  | C20  | 117.7(2) | C4   | C5   | C6   | 120.4(3)   |
| C21  | C22  | C23  | 122.4(2) | C2   | C3   | C4   | 120.9(3)   |
| C10  | C9   | C8   | 121.7(2) | C16  | C17  | C18  | 120.2(2)   |
| C13  | C8   | C9   | 119.9(2) | C17  | C18  | C19  | 119.9(2)   |
| C13  | C8   | C7   | 118.3(2) | C30  | C28  | C27  | 119.5(3)   |
| C9   | C8   | C7   | 121.7(2) | C5   | C4   | C3   | 119.4(3)   |
| C9   | C10  | C11  | 117.5(2) | C30  | C31  | C32  | 120.2(3)   |
| C24  | C23  | C22  | 119.1(2) | C31  | C30  | C28  | 120.6(3)   |
| C24  | C23  | C26  | 123.1(2) | C12  | C33  | C11  | 112.27(18) |

## References

1. H. Sun, Z. Xie, H. Wang, Y. Wu, B. Du, C. Guan and T. Yu, *J. Mater.Chem. C*, 2022, **10**, 8854-8859.
2. D. Gudeika, J. Vidas Grazulevicius, D. Volyniuk, R. Butkute, G. Juska , A. Miasojedovas, A. Gruodis, S. Jursenas, *Dyes Pigm.*, 2015, **114**, 239-252.
3. X.-F. Zhang and X. Li, *J. Lumin.*, 2011, **131**, 2263-2266.
4. D. Liu, M. Zhang, W. Tian, W. Jiang, Y. Sun, Z. Zhao and B. Z. Tang, *Aggregate*, 2022, **3**, e164.
5. C. Liu, Y. Cao, Y. Cheng, D. Wang, T. Xu, L. Su, X. Zhang and H. Dong, *Nat. Commun.*, 2020, **11**, 1735.
6. C. Lee, W. Yang and R. G. Parr, *Phys. Rev. B*, 1988, **37**, 785-789.
7. P. J. Stephens, F. J. Devlin, C. F. Chabalowski and M. J. Frisch, *J. Chem. Phys.*, 1994, **98**, 11623-11627.
8. F. Neese, *WIREs Computational Molecular Science*, 2018, **8**, e1327.
9. T. Lu and F. Chen, *J. Comput. Chem.*, 2012, **33**, 580-592.
10. Z. Liu, T. Lu and Q. Chen, *Carbon*, 2020, **165**, 461-467.
11. W. Humphrey, A. Dalke and K. Schulten, *J. Mol. Graph.*, 1996, **14**, 33-38.
